## 1 **Whole Genome Sequencing of Primary Immunodeficiency reveals a role for common and rare** 2 **variants in coding and non-coding sequences**

3  
4 James E. D. Thaventhiran<sup>1,2,29</sup>, Hana Lango Allen<sup>3,4,5,29</sup>, Oliver S. Burren<sup>1,29</sup>, James H. R. Farmery<sup>6,30</sup>, Emily  
5 Staples<sup>1,30</sup>, Zinan Zhang<sup>1,30</sup>, William Rae<sup>1</sup>, Daniel Greene<sup>3,5,7</sup>, Ilenia Simeoni<sup>3,5</sup>, Jesmeen Maimaris<sup>8,9</sup>, Chris  
6 Penkett<sup>3,4,5</sup>, Jonathan Stephens<sup>3,4,5</sup>, Sri V.V. Deevi<sup>3,4,5</sup>, Alba Sanchis-Juan<sup>3,4,5</sup>, Nicholas S Gleadall<sup>3,4,5</sup>, Moira  
7 J. Thomas<sup>10</sup>, Ravishankar B. Sargur<sup>11,12</sup>, Pavels Gordins<sup>13</sup>, Helen E. Baxendale<sup>1,14</sup>, Matthew Brown<sup>3,4,5</sup>, Paul  
8 Tuijnenburg<sup>15</sup>, Austen Worth<sup>8,9</sup>, Steven Hanson<sup>16,17</sup>, Rachel Linger<sup>3,4,5</sup>, Matthew S. Buckland<sup>16,17</sup>, Paula J.  
9 Rayner-Matthews<sup>3,4,5</sup>, Kimberly C. Gilmour<sup>8,9</sup>, Crina Samarghitean<sup>3,4,5</sup>, Suranjith L. Seneviratne<sup>16,17</sup>, Paul  
10 A. Lyons<sup>1</sup>, David M. Sansom<sup>16,17</sup>, Andy G. Lynch<sup>6,18</sup>, Karyn Megy<sup>3,4,5</sup>, Eva Ellinghaus<sup>19</sup>, David Ellinghaus<sup>20,21</sup>,  
11 Silje F. Jorgensen<sup>22,23</sup>, Tom H Karlsen<sup>19</sup>, Kathleen E. Stirrups<sup>3,4,5</sup>, Antony J. Cutler<sup>24</sup>, Dinakantha S.  
12 Kumararatne<sup>25</sup>, NBR-RD PID Consortium, NIHR BioResource<sup>5</sup>, Sinisa Savic<sup>26,27</sup>, Siobhan O. Burns<sup>16,17</sup>, Taco  
13 W. Kuijpers<sup>15,31</sup>, Ernest Turro<sup>3,4,5,7,31</sup>, Willem H. Ouwehand<sup>3,4,5,28,31</sup>, Adrian J. Thrasher<sup>8,9,31</sup>, Kenneth G. C.  
14 Smith<sup>1</sup>

- 15  
16 1. Department of Medicine, School of Clinical Medicine, University of Cambridge, Cambridge Biomedical Campus, Cambridge,  
17 UK.  
18 2. Medical Research Council, Toxicology Unit, School of Biological Sciences, University of Cambridge, Cambridge, UK  
19 3. Department of Haematology, University of Cambridge, Cambridge Biomedical Campus, Cambridge, UK.  
20 4. NHS Blood and Transplant, Cambridge Biomedical Campus, Cambridge, UK.  
21 5. NIHR BioResource, Cambridge University Hospitals, Cambridge Biomedical Campus, Cambridge, UK.  
22 6. Cancer Research UK Cambridge Institute, University of Cambridge, Li Ka Shing Centre, Robinson Way, Cambridge, UK.  
23 7. Medical Research Council Biostatistics Unit, Cambridge Biomedical Campus, Cambridge, UK.  
24 8. UCL Great Ormond Street Institute of Child Health, London, UK.  
25 9. Great Ormond Street Hospital for Children NHS Foundation Trust, London, UK.  
26 10. Department of Immunology, Queen Elizabeth University Hospital, Glasgow, UK.  
27 11. Sheffield Teaching Hospitals NHS Foundation Trust, Sheffield, UK.  
28 12. Department of Infection Immunity and Cardiovascular Disease, University of Sheffield, Sheffield, UK.  
29 13. East Yorkshire Regional Adult Immunology and Allergy Unit, Hull Royal Infirmary, Hull and East Yorkshire Hospitals NHS  
30 Trust, Hull, UK  
31 14. Royal Papworth Hospital NHS Foundation Trust, Cambridge, UK.  
32 15. Department of Pediatric Immunology, Rheumatology and Infectious Diseases, Emma Children's Hospital & The Department  
33 of Experimental Immunology, Amsterdam University Medical Center (AMC), University of Amsterdam, Amsterdam, The  
34 Netherlands.  
35 16. Institute of Immunity and Transplantation, University College London, London, UK.  
36 17. Department of Immunology, Royal Free London NHS Foundation Trust, London, UK.  
37 18. School of Mathematics and Statistics/School of Medicine, University of St Andrews, St Andrews, UK.  
38 19. K.G. Jebsen Inflammation Research Centre, Institute of Clinical Medicine, University of Oslo, Oslo University Hospital,  
39 Rikshospitalet, Oslo, Norway.  
40 20. Department of Transplantation, Institute of Clinical Medicine, University of Oslo, Oslo University Hospital, Rikshospitalet,  
41 Oslo, Norway.  
42 21. Institute of Clinical Molecular Biology, Christian Albrechts University of Kiel, Kiel, Germany.  
43 22. Section of Clinical Immunology and Infectious Diseases, Department of Rheumatology, Dermatology and Infectious  
44 Diseases, Oslo University Hospital, Rikshospitalet, Norway.  
45 23. Research Institute of Internal Medicine, Division of Surgery, Inflammatory Diseases and Transplantation, Oslo University  
46 Hospital, Rikshospitalet, Norway.  
47 24. JDRF/Wellcome Diabetes and Inflammation Laboratory, Wellcome Centre for Human Genetics, Nuffield Department of  
48 Medicine, NIHR Oxford Biomedical Research Centre, University of Oxford, Oxford, UK.  
49 25. Department of Clinical Biochemistry and Immunology, Cambridge University Hospitals, Cambridge Biomedical Campus,  
50 Cambridge, UK.  
51 26. The Department of Clinical Immunology and Allergy, St James's University Hospital, Leeds, UK.  
52 27. The NIHR Leeds Biomedical Research Centre and Leeds Institute of Rheumatic and Musculoskeletal Medicine, Leeds, UK.  
53 28. Department of Human Genetics, Wellcome Sanger Institute, Wellcome Genome Campus, Hinxton, Cambridge, UK.  
54  
55 29. These authors led the analysis: James E. D. Thaventhiran, Hana Lango Allen, Oliver S. Burren.  
56 30. These authors contributed equally: J. Henry R. Farmery, Emily Staples, Zinan Zhang  
57 31. These authors supervised this work: Taco W. Kuijpers, Ernest Turro, Willem H. Ouwehand, Adrian J. Thrasher  
58

59 **Abstract**

60

61 Primary immunodeficiency (PID) is characterised by recurrent and often life-threatening infections,  
62 autoimmunity and cancer, and it presents major diagnostic and therapeutic challenges. Although the  
63 most severe forms present in early childhood, the majority of patients present in adulthood, typically  
64 with no apparent family history and a variable clinical phenotype of widespread immune dysregulation:  
65 about 25% of patients have autoimmune disease, allergy is prevalent, and up to 10% develop lymphoid  
66 malignancies. Consequently, in sporadic PID genetic diagnosis is difficult and the role of genetics is not  
67 well defined. We addressed these challenges by performing whole genome sequencing (WGS) of a large  
68 PID cohort of 1,318 subjects. Analysis of coding regions of 886 index cases found disease-causing  
69 mutations in known monogenic PID genes in 8.2%, while a Bayesian approach (BeviMed<sup>1</sup>) identified  
70 multiple potential new disease-associated genes. Exploration of the non-coding space revealed  
71 deletions in regulatory regions which contribute to disease causation. Finally, a genome-wide  
72 association study (GWAS) identified novel PID-associated loci and uncovered evidence for co-localisation  
73 of, and interplay between, novel high penetrance monogenic variants and common variants (at the  
74 *PTPN2* and *SOCS1* loci). This begins to explain the contribution of common variants to variable  
75 penetrance and phenotypic complexity in PID. Thus, a cohort-based WGS approach to PID diagnosis can  
76 increase diagnostic yield while deepening our understanding of the key pathways determining variation  
77 in human immune responsiveness.

78

79 The phenotypic heterogeneity of PID leads to diagnostic difficulty, and almost certainly to an  
80 underestimation of its true incidence. Our cohort reflects this heterogeneity, though it is dominated by  
81 adult onset, sporadic antibody deficiency associated PID (AD-PID: comprising Common Variable  
82 Immunodeficiency (CVID), Combined Immunodeficiency (CID) and isolated antibody deficiency).  
83 Identifying a specific genetic cause of PID can facilitate definitive treatment including haematopoietic  
84 stem cell transplantation, genetic counselling, and the possibility of gene-specific therapy<sup>2-4</sup> while  
85 contributing to our understanding of the human immune system<sup>5</sup>. Unfortunately, only 29% of patients  
86 with PID receive a genetic diagnosis<sup>6</sup>. The lowest diagnosis rate is in patients who present as adults,  
87 have no apparent family history, and in whom matching the clinical phenotype to a known genetic cause  
88 is difficult, as the latter can be surprisingly variable even in patients with the same genetic defect (in the  
89 UK PID cohort 78% of cases are adult and 76% sporadic<sup>6</sup>). Moreover, while over 300 monogenic causes  
90 of PID have been described<sup>7</sup>, the genotype-phenotype correlation in PID is complex. In CVID, for  
91 example, pathogenic variants in *TACI* (*TNFRSF13B*) occur in 10% of patients but typically have low  
92 disease penetration, appearing to act as disease modifiers<sup>8</sup>. Furthermore, a common variant analysis of  
93 CVID identified two disease-associated loci, raising the possibility that common variants may impact  
94 upon clinical presentation<sup>9</sup>. We therefore investigated whether applying WGS across a “real world” PID  
95 cohort might illuminate the complex genetics of the range of conditions collectively termed PID.

96

### 97 **Patient cohort**

98

99 974 sporadic and familial PID patients, and 344 unaffected relatives, were recruited by collaborators as  
100 part of the United Kingdom NIHR BioResource - Rare Diseases program (NBR-RD; **Supplementary Note**).  
101 Of these, 886 were index cases who fell into one of the diagnostic categories of the European Society for  
102 Immunodeficiencies (ESID) registry diagnostic criteria (**Fig. 1a; Supplementary Table 1**). This cohort  
103 represents a third of CVID and half of CID patients registered in the UK<sup>10</sup>. Paediatric and familial cases  
104 were less frequent, in part reflecting prior genetic testing of more severe cases (**Supplementary Fig. 1**).  
105 Clinical phenotypes were dominated by adult-onset sporadic AD-PID: all had recurrent infections, 28%  
106 had autoimmunity, and 8% had malignancy (**Fig. 1a-b, Supplementary Table 2**), mirroring the UK  
107 national PID registry<sup>6</sup>.

108

### 109 **Identification of Pathogenic Variants in Known Genes**

110

111 We analysed coding regions of genes previously causally associated with PID<sup>11</sup> (**Methods**). We identified  
112 85 potentially causal variants in 73 index cases (8.2%) across 39 genes implicated in monogenic disease  
113 (**Fig. 1c; Supplementary Table 3**). 60 patients (6.8%) had a previously reported pathogenic variant in the  
114 disease modifier *TACI* (*TNFRSF13B*), increasing the diagnostic yield to 15.0% (133 patients). Interestingly,  
115 5 patients with a monogenic diagnosis (in *BTK*, *LRBA*, *MAGT1*, *RAG2*, *SMARCA11*) also had a pathogenic  
116 *TACI* variant. The diagnostic yield rose to 17.0% (151 patients) once novel causal variants in *NFKB1* and  
117 *ARPC1B*, associated with PID only after our initial analysis, were included. Of the 85 monogenic variants  
118 we reported, 51 (60%) had not been previously described (**Supplementary Table 3**), and 4 were  
119 structural variants, including a single exon deletion, unlikely to have been detected by whole exome  
120 sequencing<sup>12</sup>.

121

122 We observed divergence from an expected clinical phenotype for causal variants in 14 genes: for  
123 instance, only 4 of the 8 *STAT1* patients had the pathognomonic chronic mucocutaneous candidiasis<sup>13,14</sup>.  
124 A more remarkable example of phenotypic complexity was the case of a 40 year-old patient presenting  
125 with specific antibody deficiency and a premature stop variant at Arg328 in X-linked *IL2RG*, a defect  
126 expected to cause absent T and NK cells and death in infancy. We found that the mild phenotype could

127 be ascribed to several independent somatic changes that reversed the premature stop codon, restoring  
128 both T and NK cell lineages (**Fig. 1d** and **Supplementary Fig. 2**).

129  
130 Since many PID-associated genes were initially discovered in a small number of typically familial cases, it  
131 is perhaps not surprising that the phenotypes described do not reflect true clinical diversity. Thus, a  
132 cohort-based WGS approach to PID can provide a significant diagnostic yield even in a predominantly  
133 pre-screened and sporadic cohort, allows diagnoses which are not constrained by pre-existing  
134 assumptions about genotype-phenotype relationships, and suggests caution in the use of clinical  
135 phenotype in targeted gene screening and when interpreting PID genetic data.

136

### 137 **An approach to identifying new PID-associated genes in a WGS cohort**

138

139 We next sought to determine whether the cohort-based WGS approach could identify new genetic  
140 associations with PID. We developed a Bayesian inference procedure, named BeviMed<sup>1</sup>, to determine  
141 posterior probabilities of association (PPA) between each gene and case/control status of the 886 index  
142 cases and 9,283 unrelated controls (**Methods**). For each gene, we analysed variants with gnomAD minor  
143 allele frequency (MAF) <0.001 and Combined Annotation Dependent Depletion (CADD) score >=10.  
144 Genes with PPA>=0.18 are shown in **Fig. 1e**. There was a strong enrichment for known PID genes  
145 (Wilcoxon  $P < 1 \times 10^{-200}$ ), supporting this statistical approach. Two novel BeviMed-identified genes were  
146 subsequently causally associated with PID. *NFKB1* had the strongest probability of disease association  
147 (PPA=1.0), driven by truncating heterozygous variants in 13 patients. Subsequent assessment of co-  
148 segregation, protein expression, and B cell phenotype in pedigrees established these as disease-causing  
149 variants, and consequently loss of function variants in *NFKB1* as the most common monogenic cause of  
150 CVID<sup>15</sup>. Evidence of association of *ARPC1B* with PID (PPA=0.18) was driven by 2 functionally validated  
151 cases, one homozygous for a complex InDel<sup>16</sup> and the other described below.

152 The discovery of both known and subsequently validated new PID genes using BeviMed underlines its  
153 effectiveness in cohorts of unrelated patients with sporadic disease. Many candidate genes identified by  
154 BeviMed remain to be functionally validated and, as the PID cohort grows, even very rare causes of PID  
155 (e.g. affecting 0.2% of cases) will be detectable with a high positive predictive value (**Supplementary Fig.**  
156 **3**).

157

### 158 **Identification of regulatory elements contributing to PID**

159

160 Sequence variation within non-coding regions of the genome can have profound effects on spatial and  
161 temporal gene expression<sup>17</sup> and would be expected to contribute to PID susceptibility. We combined  
162 rare variant and deletion events with a tissue-relevant catalogue of cis-regulatory elements (CREs)<sup>18</sup>  
163 generated using promoter capture Hi-C (pcHi-C)<sup>19</sup> in matching tissues to prioritise putative causal PID  
164 genes (**Fig. 2a**). Being underpowered to detect single nucleotide variants affecting CREs<sup>20</sup>, we limited our  
165 initial analysis to rare structural variants (SV) overlapping exon, promoter or 'super-enhancer' CREs of  
166 known PID genes. No homozygous deletion events affecting CREs were identified, so we sought CRE SV  
167 deletions that might cause disease through a candidate compound heterozygote (cHET) mechanism with  
168 either a heterozygous rare coding variant or another SV in a pcHi-C linked gene (**Fig. 2a**). Out of 22,296  
169 candidate cHET deletion events, after filtering by MAF, functional score and known PID gene status, we  
170 obtained 10 events; the functional follow-up of three is described (**Fig. 2b**).

171

172 The *LRBA* and *DOCK8* cHET variants (**Supplementary Fig. 4**) were functionally validated; the former was  
173 demonstrated to result in impaired surface CTLA-4 expression on Treg cells (**Supplementary Fig. 5**)

174 whilst the latter led to DOCK8 deficiency as confirmed by flow cytometry (data not shown). Although in  
175 these two cases SV deletions encompassed both non-coding CREs and coding exons, the use of WGS PID  
176 cohorts to detect a contribution of CREs confined to the non-coding space would represent a major  
177 advance in PID pathogenesis and diagnosis. *ARPC1B* fulfilled this criterion, with its BeviMed association  
178 partially driven by a patient cHET for a novel p.Leu247Glyfs\*25 variant resulting in a premature stop,  
179 and a 9Kb deletion spanning the promoter region including an untranslated first exon (**Fig. 2c**) that has  
180 no coverage in the ExAC database (<http://exac.broadinstitute.org>). Two first-degree relatives were  
181 heterozygous for the frameshift variant, and two for the promoter deletion (**Fig. 2d**). Western blotting  
182 demonstrated complete absence of ARPC1B (**Fig. 2e**) and, consistent with previous reports<sup>21</sup>, raised  
183 ARPC1A in platelets. *ARPC1B* mRNA was almost absent from mononuclear cells in the cHET patient and  
184 reduced in a clinically unaffected sister carrying the frameshift mutation (**Fig. 2f**). An allele specific  
185 expression assay demonstrated that the promoter deletion essentially abolished mRNA expression (**Fig.**  
186 **2g,h**).

187 These examples show the utility of WGS for detecting compound heterozygosity for a coding variant and  
188 a non-coding CRE deletion, and demonstrate a further advantage of a WGS approach to PID diagnosis.  
189 Improvements in analysis methodology, cohort size and better annotation of regulatory regions will be  
190 required to explore the non-coding space more fully and discover new disease-causing genetic variants.

191

### 192 **WGS identifies PID-associated telomere shortening**

193

194 A striking example of WGS data providing more than just the linear genomic sequence is telomere  
195 length estimation from mapped and unmapped reads<sup>22</sup>. We validated this method by showing  
196 correlation with gender (**Fig. 3a**) and a particularly strong correlation with age (**Supplementary Fig. 6**) in  
197 3,313 NBR-RD subjects (**Methods**). We demonstrated the effectiveness of this, the first large-scale  
198 application of WGS-based telomere length estimation, by replicating an association with the telomerase  
199 RNA component gene (*TERC*: **Supplementary Table 4**)<sup>23</sup> and identifying several PID cases with short  
200 telomeres (**Fig. 3b**). Given that disruption of telomerase genes can cause PID<sup>24</sup>, we looked for potentially  
201 damaging coding variants in known telomere deficiency genes<sup>25</sup> in these PID cases, identifying 3 subjects  
202 with novel variants potentially causative for telomerase deficiency (**Fig. 3b**). One had a homozygous  
203 defect in telomerase reverse transcriptase (*TERT*), a subunit of the telomerase complex. Two male  
204 siblings were found to have a hemizygous variant in dyskerin (*DKC1*), known to be associated with PID  
205 and X-linked dyskeratosis congenita<sup>26</sup> (**Fig. 3c**). Therefore, WGS telomere length estimation can be used  
206 as an effective approach to identify PID patients with novel variants causing telomere shortening.

207

### 208 **GWAS of the WGS cohort reveals novel PID-associated loci**

209

210 The diverse clinical phenotype and variable within-family disease penetrance of PID may be in part due  
211 to stochastic events (e.g. unpredictable pathogen transmission) but may also have a genetic basis. We  
212 therefore performed a GWAS of common SNPs (MAF>0.05), restricted to 733 AD-PID cases (**Fig. 1a**) to  
213 reduce phenotypic heterogeneity, and 9,225 unrelated NBR-RD controls. We confirmed the known MHC  
214 association and identified additional loci with suggestive association (**Fig. 4a, Supplementary Fig. 7**). A  
215 GWAS of SNPs of intermediate frequency (0.005<MAF<0.05) identified a single locus incorporating  
216 *TNFRSF13B* (**Fig. 4a, Supplementary Table 5, Extended Data Fig. 1**), for which the lead p.Cys104Arg  
217 variant has been previously reported<sup>27</sup>.

218 To increase power, we conducted a fixed effect meta-analysis of the AD-PID GWAS with summary  
219 statistics data from an ImmunoChip study of 778 CVID cases and 10,999 controls<sup>9</sup> (**Fig. 4a,**  
220 **Supplementary Table 5**). This amplified the MHC and 16p13.13 associations<sup>9</sup>, found an additional locus



221 at 3p24.1 within the promoter region of *EOMES* (**Extended Data Fig. 2**), and a suggestive association at  
222 18p11.21 proximal to *PTPN2* (**Extended Data Fig. 3**). Conditional analysis of the MHC locus revealed  
223 independent signals at the Class I and Class II regions (**Supplementary Fig. 8**), driven by classical alleles  
224 HLA-B\*08:01 and HLA-DRB1\*15:01 (**Methods**) with amino-acid changes known to impact upon peptide  
225 binding (**Fig. 4b**).

226 We next sought to examine, genome-wide, the enrichment of non-MHC AD-PID associations in 9 other  
227 diseases (**Extended Data Table 1**). We found significant enrichment for allergic (e.g. asthma) and  
228 immune-mediated diseases (e.g. Crohn's disease), which was not evident in Type 2 diabetes or coronary  
229 artery disease (**Fig. 4c**). This suggests that the common variant association between PID and other  
230 immune-mediated diseases extends beyond the 4 genome-wide loci to multiple sub-genome-wide  
231 associations, and that dysregulation of common pathways contributes to susceptibility to both.  
232 Understanding the impact of these interrelationships will be a complex process. For example, while  
233 variants in the *HLA-DRB1* and 16p13.13 loci increase the risk of both PID and autoimmunity, those at the  
234 *EOMES* locus predispose to PID but protect from rheumatoid arthritis<sup>28</sup> (**Extended Data Fig. 2**).

235

236 Given this observed enrichment, we sought to investigate whether candidate genes identified through  
237 large cohort association analysis of immune-mediated disease might have utility in prioritising novel  
238 candidate genes harbouring rare coding variation causal for PID. We used the data-driven capture-HiC  
239 omnibus gene score (COGS) approach<sup>19</sup> to prioritise putative causal genes across the 4 non-MHC AD-PID  
240 loci identified by our meta-analysis, and assessed across 11 immune-mediated diseases (**Supplementary**  
241 **Tables 5 and 6**). Hypothesising that causal PID genes would be intolerant to protein-truncating variation,  
242 we computed an overall prioritisation score by taking the product of pLI (a measure of tolerance to loss  
243 of gene function) and COGS gene scores for each disease. Six protein coding genes had an above  
244 average prioritisation score in one or more diseases (**Fig. 4d**) which we examined for rare, potentially  
245 causative variants within our cohort. We identified a single protein truncating variant in *ETS1*, *SOCS1*  
246 and *PTPN2* genes, all occurring exclusively in PID patients in the NBR-RD cohort. None of the genes are  
247 recognised causes of PID despite their involvement in immune processes (**Supplementary Discussion**).  
248 The two cases with *SOCS1* and *PTPN2* variants were analysed further.

249

250 The patient with a heterozygous protein-truncating *SOCS1* variant (p.Met161Alafs\*46) presented with  
251 CVID complicated by lung and liver inflammation and B cell lymphopenia (**Supplementary Discussion**,  
252 **Supplementary Fig. 9**). *SOCS1* limits phosphorylation of targets including STAT1, and is a key regulator of  
253 IFN- $\gamma$  signalling. *SOCS1* haploinsufficiency in mice leads to B lymphopenia<sup>29,30</sup>, immune-mediated liver  
254 inflammation<sup>31</sup> and colitis<sup>32</sup>. In patient T cell blasts *SOCS1* was deficient and IFN- $\gamma$  induced STAT1  
255 phosphorylation was abnormal (**Fig. 4e**), consistent with *SOCS1* haploinsufficiency causing PID. The  
256 patient also carries the *SOCS1* pHiC-linked 16p13.13 risk-allele identified in the AD-PID GWAS  
257 (**Extended Data Fig. 4**). Long read sequencing using Oxford Nanopore technology showed this to be in  
258 *trans* with the novel *SOCS1*-truncating variant (**Methods**); such compound heterozygosity raises the  
259 possibility that common and rare variants may combine to cause disease.

260

261 A more detailed example of an interplay between rare and common variants is provided by a family  
262 containing a novel *PTPN2* premature stop-gain at p.Glu291 and a common autoimmunity-associated  
263 variant (**Fig. 4f**). *PTPN2* encodes the non-receptor T-cell protein tyrosine phosphatase (TC-PTP) protein,  
264 that negatively regulates immune responses by dephosphorylation of the proteins mediating cytokine  
265 signalling. *PTPN2* deficient mice are B cell lymphopenic<sup>33,34</sup>, while inducible haematopoietic deletion of  
266 *PTPN2* leads to B and T cell proliferation and autoimmunity<sup>35</sup>. The novel truncating variant was  
267 identified in a "sporadic" index case presenting with CVID at age 20; he had B lymphopenia  
268 (**Supplementary Fig. 9**), low IgG, symmetrical rheumatoid-like polyarthropathy, severe recurrent

269 bacterial infections, splenomegaly and inflammatory lung disease. His mother, also heterozygous for the  
270 *PTPN2* truncating variant, had systemic lupus erythematosus (SLE), insulin-dependent diabetes mellitus  
271 diagnosed at 42, hypothyroidism and autoimmune neutropenia (**Supplementary Discussion**). Gain-of-  
272 function variants in *STAT1* can present as CVID (**Supplementary Table 3**) and TC-PTP, like *SOCS1*,  
273 reduces phosphorylated-STAT1 (**Fig. 4g**). Both mother and son demonstrated reduced TC-PTP expression  
274 and *STAT1* hyperphosphorylation in T cell blasts, similar to the *SOCS1* haploinsufficient patient above  
275 and to known *STAT1* GOF patients; abnormalities that were more pronounced in the *PTPN2* index case  
276 (**Fig. 4h**).

277  
278 The index case, but not his mother, carried the G allele of variant rs2847297 at the *PTPN2* locus, an  
279 expression quantitative trait locus (eQTL)<sup>36</sup> previously associated with rheumatoid arthritis<sup>37</sup>. His  
280 brother, generally healthy apart from severe allergic nasal polyposis, was heterozygous at rs2847297  
281 and did not inherit the rare variant (**Fig. 4f**). Allele-specific expression analysis demonstrated reduced  
282 *PTPN2* transcription from the rs2847297-G allele, explaining the lower expression of TC-PTP and greater  
283 persistence of pSTAT1 in the index case compared to his mother (**Fig. 4i**). This in turn could explain the  
284 variable disease penetrance in this family, with *PTPN2* haploinsufficiency alone driving autoimmunity in  
285 the mother, but with the additional impact of the common variant on the index case causing  
286 immunodeficiency (and perhaps reducing the autoimmune phenotype). The family illustrates the power  
287 of cohort-wide WGS approach to PID diagnosis, by revealing both a new monogenic cause of disease,  
288 and how the interplay between common and rare genetic variants may contribute to the variable clinical  
289 phenotypes of PID.

290  
291 In summary, we show that cohort-based WGS in PID is a powerful approach to provide immediate  
292 diagnosis of known genetic defects, and to discover new coding and non-coding variants associated with  
293 disease. Intriguingly, even with a limited sample size, we could explore the interface between common  
294 and rare variant genetics, explaining why PID encompasses such a complex range of clinical syndromes  
295 of variable penetrance. Increasing cohort size will be crucial for powering the analyses needed to  
296 identify both causal and disease-modifying variants, thus unlocking the potential of WGS for PID  
297 diagnosis. Improved analysis methodology and better integration of parallel datasets, such as GWAS and  
298 cell surface or metabolic immunophenotyping, will allow further exploration of the non-coding space  
299 and enhance diagnostic yield. Such an approach promises to transform our understanding of genotype-  
300 phenotype relationships in PID and related immune-mediated conditions, and could redefine the clinical  
301 boundaries of immunodeficiency, add to our understanding of human immunology, and ultimately  
302 improve patient outcomes.

303  
304  
305  
306 **Acknowledgements:** Funding for the NIHR-BioResource was provided by the National Institute for Health  
307 Research (NIHR, grant number RG65966). We gratefully acknowledge the participation of all NIHR  
308 BioResource volunteers, and thank the NIHR BioResource centre and staff for their contribution. J.E.D.T.  
309 is supported by the MRC (RG95376 and MR/L006197/1). AJT is supported by the Wellcome Trust  
310 (104807/Z/14/Z) and the NIHR Biomedical Research Centre at Great Ormond Street Hospital for Children  
311 NHS Foundation Trust and University College London. KGCS is supported by the Medical Research  
312 Council (program grant MR/L019027) and is a Wellcome Investigator. AJC was supported by the  
313 Wellcome [091157/Z/10/Z], [107212/Z/15/Z], [100140/Z/12/Z], [203141/Z/16/Z]; JDRF [9-2011-253], [5-  
314 SRA-2015-130-A-N]; NIHR Oxford Biomedical Research Centre and the NIHR Cambridge Biomedical  
315 Research Centre. EE has received funding from the European Union Seventh Framework Programme  
316 (FP7-PEOPLE-2013-COFUND) under grant agreement no 609020- Scientia Fellows.

317

318 Author Contributions: JEDT, ES, JS, ZZ, WR, NSG, PT, AJC carried out experiments. HLA, OSB, JEDT, JHRF,  
319 DG, IS, CP, SVVD, ASJ, JM, JS, PAL, AGL, KM, EE, DE, SFJ, THK, ET performed computational analysis of the  
320 data. HLA, IS, CP, MB, CS, RL, PJRM, JS, KES conducted sample and data processing. JEDT, ES, WR, MJT,  
321 RBS, PG, HEB, AW, SH, RL, MSB, KCG, DSK, SS, SOB, TWK, WHO, AJT recruited patients, provided clinical  
322 phenotype data and confirmed genetic diagnosis. All authors contributed to the analysis of the  
323 presented results. KGCS, JEDT, HLA and OSB wrote the paper with input from all other authors. KGCS,  
324 WHO, AJT and TWK conceived and oversaw the research programme.

325

326

327 Members of the NBR-RD PID Consortium: Zoe Adhya, Hana Alachkar, Ariharan Anantharachagan,  
328 Richard Antrobus, Gururaj Arumugakani, Chiara Bacchelli, Helen E Baxendale, Claire Bethune, Shahnaz  
329 Bibi, Barbara Boardman, Claire Booth, Matthew Brown, Michael J Browning, Mary Brownlie, Matthew S  
330 Buckland, Siobhan O Burns, Oliver S Burren, Anita Chandra, Hayley Clifford, Nichola Cooper, Godelieve J  
331 de Bree, E Graham Davies, Sarah Deacock, John Dempster, Lisa A Devlin, Elizabeth Drewe, J David M  
332 Edgar, William Egner, Tariq El-Shanawany, James H R Farmery, H Bobby Gaspar, Rohit Ghurye, Kimberly  
333 C Gilmour, Sarah Goddard, Pavels Gordins, Sofia Grigoriadou, Scott J Hackett, Rosie Hague, Lorraine  
334 Harper, Grant Hayman, Archana Herwadkar, Stephen Hughes, Aarnoud P Huissoon, Stephen Jolles, Julie  
335 Jones, Yousuf M Karim, Peter Kelleher, Sorena Kiani, Nigel Klein, Taco W Kuijpers, Dinakantha S  
336 Kumararatne, James Laffan, Hana Lango Allen, Sara E Lear, Hilary Longhurst, Lorena E Lorenzo, Paul A  
337 Lyons, Jesmeen Maimaris, Ania Manson, Elizabeth M McDermott, Hazel Millar, Anoop Mistry, Valerie  
338 Morrisson, Sai H K Murng, Iman Nasir, Sergey Nejentsev, Sadia Noorani, Eric Oksenhendler, Mark J  
339 Ponsford, Waseem Qasim, Ellen Quinn, Isabella Quinti, Alex Richter, Crina Samarghitean, Ravishankar B  
340 Sargur, Sinisa Savic, Suranjith L Seneviratne, W A Carrock Sewell, Fiona Shackley, Ilenia Simeoni, Kenneth  
341 G C Smith, Emily Staples, Hans Stauss, Cathal L Steele, James E Thaventhiran, David C Thomas, Moira J  
342 Thomas, Adrian J Thrasher, John A Todd, Anton T J Tool, Rafal D Urniaz, Steven B Welch, Lisa Willcocks,  
343 Sarita Workman, Austen Worth, Nigel Yeatman, Patrick F K Yong

344

345

346 The authors declare no competing financial interests.

347

348

349 Correspondence and requests for materials should be addressed to J.E.D.T. (jedt2@cam.ac.uk) and  
350 K.G.C.S. (kgcs2@cam.ac.uk)

351

352

353

## 354 **References**

355

- 356 1. Greene, D., Richardson, S. & Turro, E. A Fast Association Test for Identifying Pathogenic Variants  
357 Involved in Rare Diseases. *Am. J. Hum. Genet.* **101**, 104–114 (2017).
- 358 2. Chaigne-Delalande, B. *et al.* Mg<sup>2+</sup> Regulates Cytotoxic Functions of NK and CD8 T Cells in Chronic  
359 EBV Infection Through NKG2D. *Science (80- )*. **341**, 186–191 (2013).
- 360 3. Lo, B. *et al.* Patients with LRBA deficiency show CTLA4 loss and immune dysregulation responsive  
361 to abatacept therapy. *Science* **349**, 436–40 (2015).
- 362 4. Rao, V. K. *et al.* Effective ‘activated PI3K $\delta$  syndrome’-targeted therapy with the PI3K $\delta$  inhibitor  
363 leniolisib. *Blood* **130**, 2307–2316 (2017).
- 364 5. Casanova, J.-L. Human genetic basis of interindividual variability in the course of infection. *Proc.*  
365 *Natl. Acad. Sci. U. S. A.* **112**, E7118-27 (2015).
- 366 6. Edgar, J. D. M. *et al.* The United Kingdom Primary Immune Deficiency (UKPID) Registry: report of



- 367 the first 4 years' activity 2008-2012. *Clin. Exp. Immunol.* **175**, 68–78 (2014).
- 368 7. Bousfiha, A. *et al.* The 2017 IUIS Phenotypic Classification for Primary Immunodeficiencies. *J. Clin.*  
369 *Immunol.* **38**, 129–143 (2018).
- 370 8. Pan-Hammarström, Q. *et al.* Reexamining the role of TACI coding variants in common variable  
371 immunodeficiency and selective IgA deficiency. *Nat. Genet.* **39**, 429–430 (2007).
- 372 9. Li, J. *et al.* Association of CLEC16A with human common variable immunodeficiency disorder and  
373 role in murine B cells. *Nat. Commun.* **6**, 6804 (2015).
- 374 10. Shillitoe, B. *et al.* The United Kingdom Primary Immune Deficiency (UKPID) registry 2012 to 2017.  
375 *Clin. Exp. Immunol.* **192**, 284–291 (2018).
- 376 11. Bousfiha, A. *et al.* The 2015 IUIS Phenotypic Classification for Primary Immunodeficiencies. *J. Clin.*  
377 *Immunol.* **35**, 727–38 (2015).
- 378 12. Fromer, M. *et al.* Discovery and statistical genotyping of copy-number variation from whole-  
379 exome sequencing depth. *Am. J. Hum. Genet.* **91**, 597–607 (2012).
- 380 13. van de Veerdonk, F. L. *et al.* STAT1 Mutations in Autosomal Dominant Chronic Mucocutaneous  
381 Candidiasis. *N. Engl. J. Med.* **365**, 54–61 (2011).
- 382 14. Liu, L. *et al.* Gain-of-function human STAT1 mutations impair IL-17 immunity and underlie chronic  
383 mucocutaneous candidiasis. *J. Exp. Med.* **208**, 1635–48 (2011).
- 384 15. Tuijnenburg, P. *et al.* Loss-of-function nuclear factor  $\kappa$ B subunit 1 (NFKB1) variants are the most  
385 common monogenic cause of common variable immunodeficiency in Europeans. *J. Allergy Clin.*  
386 *Immunol.* **142**, 1285–1296 (2018).
- 387 16. Kuijpers, T. W. *et al.* Combined immunodeficiency with severe inflammation and allergy caused  
388 by ARPC1B deficiency. *J. Allergy Clin. Immunol.* **140**, 273–277.e10 (2017).
- 389 17. Lettice, L. A. *et al.* A long-range Shh enhancer regulates expression in the developing limb and fin  
390 and is associated with preaxial polydactyly. *Hum. Mol. Genet.* **12**, 1725–35 (2003).
- 391 18. Hnisz, D. *et al.* Super-Enhancers in the Control of Cell Identity and Disease. *Cell* **155**, 934–947  
392 (2013).
- 393 19. Javierre, B. M. *et al.* Lineage-Specific Genome Architecture Links Enhancers and Non-coding  
394 Disease Variants to Target Gene Promoters. *Cell* **167**, 1369–1384.e19 (2016).
- 395 20. Short, P. J. *et al.* De novo mutations in regulatory elements in neurodevelopmental disorders.  
396 *Nature* **555**, 611–616 (2018).
- 397 21. Kahr, W. H. A. *et al.* Loss of the Arp2/3 complex component ARPC1B causes platelet  
398 abnormalities and predisposes to inflammatory disease. *Nat. Commun.* **8**, 14816 (2017).
- 399 22. Farmery, J. H. R., Smith, M. L. & Lynch, A. G. Telomerecat: A ploidy-agnostic method for  
400 estimating telomere length from whole genome sequencing data. *Sci. Rep.* **8**, 1300 (2018).
- 401 23. Codd, V. *et al.* Identification of seven loci affecting mean telomere length and their association  
402 with disease. *Nat. Genet.* **45**, 422–7, 427e1–2 (2013).
- 403 24. Jyonouchi, S., Forbes, L., Ruchelli, E. & Sullivan, K. E. Dyskeratosis congenita: a combined  
404 immunodeficiency with broad clinical spectrum - a single-center pediatric experience. *Pediatr.*  
405 *Allergy Immunol.* **22**, 313–9 (2011).
- 406 25. Tummala, H. *et al.* Poly(A)-specific ribonuclease deficiency impacts telomere biology and causes  
407 dyskeratosis congenita. *J. Clin. Invest.* **125**, 2151–60 (2015).
- 408 26. Cossu, F. *et al.* A novel DKC1 mutation, severe combined immunodeficiency (T+B-NK- SCID) and  
409 bone marrow transplantation in an infant with Hoyeraal-Hreidarsson syndrome. *Br. J. Haematol.*  
410 **119**, 765–8 (2002).
- 411 27. Salzer, U. *et al.* Mutations in TNFRSF13B encoding TACI are associated with common variable  
412 immunodeficiency in humans. *Nat. Genet.* **37**, 820–828 (2005).
- 413 28. Okada, Y. *et al.* Genetics of rheumatoid arthritis contributes to biology and drug discovery.  
414 *Nature* **506**, 376–381 (2014).
- 415 29. Starr, R. *et al.* Liver degeneration and lymphoid deficiencies in mice lacking suppressor of  
416 cytokine signaling-1. *Proc. Natl. Acad. Sci. U. S. A.* **95**, 14395–9 (1998).
- 417 30. Alexander, W. S. *et al.* SOCS1 is a critical inhibitor of interferon gamma signaling and prevents the  
418 potentially fatal neonatal actions of this cytokine. *Cell* **98**, 597–608 (1999).

- 419 31. Yoshida, T. *et al.* SOCS1 is a suppressor of liver fibrosis and hepatitis-induced carcinogenesis. *J.*  
420 *Exp. Med.* **199**, 1701–7 (2004).
- 421 32. Horino, J. *et al.* Suppressor of cytokine signaling-1 ameliorates dextran sulfate sodium-induced  
422 colitis in mice. *Int. Immunol.* **20**, 753–62 (2008).
- 423 33. Bourdeau, A. *et al.* TC-PTP-deficient bone marrow stromal cells fail to support normal B  
424 lymphopoiesis due to abnormal secretion of interferon- $\gamma$ . *Blood* **109**, 4220–8 (2007).
- 425 34. You-Ten, K. E. *et al.* Impaired bone marrow microenvironment and immune function in T cell  
426 protein tyrosine phosphatase-deficient mice. *J. Exp. Med.* **186**, 683–93 (1997).
- 427 35. Wiede, F., Sacirbegovic, F., Leong, Y. A., Yu, D. & Tiganis, T. PTPN2-deficiency exacerbates T  
428 follicular helper cell and B cell responses and promotes the development of autoimmunity. *J.*  
429 *Autoimmun.* **76**, 85–100 (2017).
- 430 36. Kilpinen, H. *et al.* Common genetic variation drives molecular heterogeneity in human iPSCs.  
431 *Nature* **546**, 370–375 (2017).
- 432 37. Okada, Y. *et al.* Meta-analysis identifies nine new loci associated with rheumatoid arthritis in the  
433 Japanese population. *Nat. Genet.* **44**, 511–6 (2012).
- 434

## 435 Figure Legends

436

### 437 **Figure 1. Description of the immunodeficiency cohort and disease associations in coding regions. (a)**

438 Number of index cases recruited under different phenotypic categories (red – adult cases, blue –  
439 paediatric cases). **(b)** Number of index cases with malignancy, autoimmunity and CD4+ lymphopenia.  
440 (black bar – total number of cases, blue bar - number of cases with AD-PID phenotype). **(c)** Number of  
441 patients with reported genetic findings subdivided by gene. Previously reported variants are those  
442 identified as immune disease-causing in the HGMD-Pro database. **(d)** Pie charts showing proportions of  
443 the germline p.Arg328\* stop-gain variant and different somatic reversions in FACS-sorted blood cell  
444 populations from a male adult patient with an inherited *IL2RG* mutation that causes X-linked infantile  
445 fatality. **(e)** BeviMed assessment of enrichment for candidate disease-causing variants in individual genes,  
446 in the PID cohort relative to the rest of NBR-RD cohort. The top candidate genes (with BeviMed  
447 PPA $\geq$ 0.18) are shown. Named genes are those in which the variants driving the association have been  
448 confirmed to be causal.

449

### 450 **Figure 2. Assessment of WGS data for regulatory region deletions that impact upon PID (a)**

451 Schematic overview of configurations of large deletions and putative damaging variants that could lead to gene loss  
452 of function. **(b)** Flow-chart demonstrating filtering steps to prioritise patients with candidate compound  
453 heterozygous causal variants comprising of a rare (gnomAD v1 AF $<$ 0.001) damaging (CADD $>$ 20) coding  
454 variant within a known PID gene, and a structural deletion event (with internal MAF $<$ 0.03) over the gene's  
455 regulatory region. **(c)** Genomic configuration of the *ARPC1B* gene locus highlighting the compound  
456 heterozygous gene variants. ExAC shows that the non-coding deletion is outside of the exome-targeted  
457 regions. **(d)** Pedigree of patient in (c) and co-segregation of *ARPC1B* genotype (wt – wild-type, del –  
458 deletion, fs – frameshift). **(e)** *ARPC1A* and *ARPC1B* protein levels in neutrophils and platelets in the patient  
459 depicted in (c). **(f)** Histogram showing *ARPC1B* mRNA levels in patient depicted in (c), her sibling  
460 highlighted in (d), and healthy control. **(g)** Allele-specific expression assay showing the ratio of wt, del and  
461 fs alleles in genomic DNA (gDNA) from peripheral blood mononuclear cells of the patient and sibling. **(h)**  
462 Relative expression of *ARPC1B* mRNA from each allele in the patient and sibling. Allele-specific expression  
463 assessed in complementary DNA (cDNA; synthesized from pre-mRNA).

464

### 465 **Figure 3. Telomere lengths calculated from whole-genome data can be used to identify causal rare and**

466 **common genomic variants associated with telomere variation. (a)** Telomerecat calculated telomere  
467 lengths (TLs) against age and sex in 3,313 NBR-RD recruited subjects. The Boxplot summarises the  
468 distribution of TLs within an age and gender bin; the lower, mid and upper box bounds represent the first,  
469 second (median) and third quartile respectively. Lines extend to 1.5 times the interquartile range, and  
470 outliers are marked as individual points. **(b)** Centiles of telomere lengths against age in PID cases. Symbols  
471 represent subjects with rare genomic homozygous/hemizygous single nucleotide variants (SNV) in *TERT*  
472 and *DKC1*. **(c)** Top: Pedigree of individuals with *DKC1* variants showing co-segregation with disease  
473 phenotypes. The four individuals assayed by Flow-FISH are marked by dotted line. Bottom: Flow-FISH  
474 assessment of telomere length in *DKC1* variant carrying siblings and their spouses in granulocytes and  
475 lymphocytes.

476

### 477 **Figure 4. Antibody deficiency (AD-PID) GWAS identifies common variants that mediate disease risk**

478 **and suggests novel monogenic candidate genes. (a)** A composite Manhattan plot for the AD-PID GWAS.  
479 Blue – common variants (MAF $>$ 0.05) analysed in this study (NBR-RD) only, red – meta-analysed with

480 data from Li *et al.*; and purple – genome-wide significant low frequency ( $0.005 < \text{MAF} < 0.05$ ) variants in  
481 *TNFRSF13B* locus. Loci of interest are labelled with putative causal protein coding gene names. **(b)**  
482 Protein modelling of two independent MHC locus signals: residue E71 on HLA-DRB1\*1501 and residue  
483 N114 on HLA-B\*0801 using PDB 1BX2 and PDB 4QRQ respectively. Protein is depicted in white,  
484 highlighted residue in red, and peptide is in green. **(c)** Immune mediated trait enrichment of AD-PID  
485 association signals. CAD – coronary artery disease, CRO – Crohn’s disease, RA – rheumatoid arthritis,  
486 SLE – systemic lupus erythematosus, T1D – type 1 diabetes, T2D – type 2 diabetes and UC – ulcerative  
487 colitis (**See Extended Data Table 1**). **(d)** COGS prioritisation scores of candidate monogenic causes of  
488 PID using previous autoimmune targeted genotyping studies (See Supplementary Table 6) across  
489 suggestive AD-PID loci ( $n=4$ ). For clarity, only diseases prioritising one or more genes are shown. CEL –  
490 coeliac disease, CRO- Crohn’s disease, UC – ulcerative colitis, MS – multiple sclerosis, PBC – primary  
491 biliary cirrhosis and T1D – type 1 diabetes **(e)** T cells from the *SOCS1* mutation patient and healthy  
492 control were cultured following TCR/CD28 stimulation in the presence of anti-IFN- $\gamma$  and anti-IFN- $\gamma$ R  
493 antibodies. At day 4 post-stimulation cells were washed and re-cultured without IFN- $\gamma$  blockade. At day  
494 6 cells were stimulated for 2 hours with IFN- $\gamma$  and protein-lysates assessed for the indicated protein  
495 expression. (Left) Representative western blot. (Right) The pSTAT1 and SOCS1 levels calculated from  
496 image quantification of the western blots in 4 replicate samples. Error bars represent standard error of  
497 mean. **(f)** The pedigree of the CVID patient identified with a premature stop mutation in *PTPN2*. Carriers  
498 of the rs2847297-G risk allele are indicated. **(g)** Simplified model of how SOCS1 and TC-PTP limit the  
499 phosphorylated-STAT1 triggered by interferon signalling. **(h)** T cells from the indicated members of the  
500 *PTPN2* pedigree, 3 healthy controls, the *SOCS1* mutation patient and a *STAT1* gain of function (GOF)  
501 patient were cultured for 4 days and treated +/- IFN- $\gamma$  for 2 hours and protein-lysates assessed for  
502 protein levels. (Left) PTPN2 protein levels normalised to Tublin level (loading control). (Right) pSTAT1  
503 protein levels normalised to total STAT1 level. **(i)** Relative expression from each allele of the *PTPN2*  
504 rs2847297 locus in the sibling II.3 of the CVID patient II.1 in (f). Shown are the proportion of directly  
505 genotyped individual bacterial colonies, transformed with the PCR product containing the rheumatoid  
506 arthritis risk allele rs2847297-G generated from either gDNA or cDNA.

507

## 508 **Methods**

509

### 510 PID cohort

511 The PID patients and their family members were recruited by specialists in clinical immunology across 26  
512 hospitals in the UK, and one each from the Netherlands, France and Germany. The recruitment criteria  
513 were intentionally broad, and included the following: clinical diagnosis of common variable  
514 immunodeficiency disorder (CVID) according to internationally established criteria (**Supplementary**  
515 **Table 1**); extreme autoimmunity; or recurrent and/or unusual severe infections suggestive of defective  
516 innate or cell-mediated immunity. Patients with known secondary immunodeficiencies caused by cancer  
517 or HIV infection were excluded. Although screening for more common and obvious genetic causes of PID  
518 prior to enrolment into this WGS study was encouraged, it was not a requirement. Consequently, a  
519 minority of patients (16%) had some prior genetic testing, from single gene Sanger sequencing or MLPA  
520 to a gene panel screen.

521 To expedite recruitment a minimal clinical dataset was required for enrolment, though more detail was  
522 often provided. There was a large variety in patients' phenotypes, from simple "chest infections" to  
523 complex syndromic features, and the collected phenotypic data of the sequenced individuals ranged  
524 from assigned disease category only to detailed clinical synopsis and immunophenotyping data. The  
525 clinical subsets used to subdivide PID patients were based on ESID definitions, as shown in  
526 **Supplementary Table 1.**

527 To facilitate analysis by grouping patients with a degree of phenotypic coherence while excluding some  
528 distinct and very rare clinical subtypes of PID that may have different aetiologies, a group of patients  
529 was determined to have antibody deficiency-associated PID (AD-PID). This group comprised 733 of the  
530 886 unrelated index cases, and included all patients with CID, CVID or Antibody Defect ticked on the  
531 recruitment form, together with patients requiring IgG replacement therapy and those with specified  
532 low levels of IgG/A/M. SCID patients satisfying these criteria were not assigned to the AD-PID cohort.

533

### 534 WGS data processing

535 Details of DNA sample processing, whole genome sequencing, data processing pipeline, quality checks,  
536 alignment and variant calling, ancestry and relatedness estimation, variant normalisation and  
537 annotation, large deletion calling and filtering, and allele frequency calculations, are fully described in  
538 [NIHR BioResource, in preparation; see Cover Letter]. Briefly, DNA or whole blood EDTA samples were  
539 processed and quality checked according to standard laboratory practices and shipped on dry ice to the  
540 sequencing provider (Illumina Inc, Great Chesterford, UK). Illumina Inc performed further QC array  
541 genotyping, before fragmenting the samples to 450bp fragments and processing with the Illumina  
542 TruSeq DNA PCR-Free Sample Preparation kit (Illumina Inc., San Diego, CA, USA). Over the three-year  
543 duration of the sequencing phase of the project, different instruments and read lengths were used: for  
544 each sample, either 100bp reads on three HiSeq2500 lanes; or 125bp reads on two HiSeq2500 lanes; or  
545 150bp reads on a single HiSeq X lane. Each delivered genome had a minimum 15X coverage over at least  
546 95% of the reference autosomes. Illumina performed the alignment to GRCh37 genome build and  
547 SNV/InDel calling using their Isaac software, while large deletions were called with their Manta and  
548 Canvas algorithms. The WGS data files were received at the University of Cambridge High Performance  
549 Computing Service (HPC) for further QC and processing by our Pipeline team.

550 For each sample, we estimated the sex karyotype and computed pair-wise kinship coefficients using  
551 PLINK, which allowed us to identify sample swaps and unintended duplicates, assign ethnicities,  
552 generate networks of closely related individuals (sometimes undeclared relatives from across different  
553 disease domains) and a maximal unrelated sample set (for the purposes of allele frequency estimation  
554 and control dataset in case-control analyses). Variants in the gVCF files were normalised and loaded into



555 an HBase database, where Overall Pass Rate (OPR) was computed within each of the three read length  
556 batches, and the lowest of these OPR values (minOPR) assigned to each variant.

557 Large deletions were merged and analysed collectively, as described in [NIHR BioResource, in  
558 preparation]. The analyses presented here are based on SNVs/InDels with OPR>0.98, and a set of  
559 deletions found through the SVH method to have high specificity after extensive manual inspection of  
560 individual deletion calls. Variants were annotated with Sequence Ontology terms according to their  
561 predicted consequences, their frequencies in other genomic databases (gnomAD, UK10K, 1000  
562 Genomes), if they have been associated with a disease according to the HGMD Pro database, and  
563 internal metrics (AN, AC, AF, OPR).

564

#### 565 Diagnostic reporting

566 We screened all genes in the IUIS 2015 classification for potentially causal variants. SNVs and small  
567 InDels were filtered based on the following criteria: OPR>0.95; having a protein-truncating consequence,  
568 gnomAD AF<0.001 and internal AF<0.01; or present in the HGMD Pro database as DM variant. Large  
569 deletions called by both Canvas and Manta algorithms, passing standard Illumina quality filters,  
570 overlapping at least one exon, and classified as rare by the SVH method were included in the analysis. In  
571 order to aid variant interpretation and consistency in reporting, phenotypes were translated into Human  
572 Phenotype Ontology (HPO) terms as much as possible. Multi-Disciplinary Team (MDT) then reviewed  
573 each variant for evidence of pathogenicity and contribution to the phenotype, and classified them  
574 according to the American College of Medical Genetics (ACMG) guidelines<sup>38</sup>. Only variants classified as  
575 Pathogenic or Likely Pathogenic were systematically reported, but individual rare (gnomAD AF<0.001) or  
576 novel missense variants that BeviMed analysis (see below) highlighted as having a posterior probability  
577 of pathogenicity >0.2 were additionally considered as Variants of Unknown Significance (VUS). If the  
578 MDT decided that they were likely to be pathogenic and contribute to the phenotype, they were also  
579 reported and counted towards the overall diagnostic yield. All variants and breakpoints of large  
580 deletions reported in this study were confirmed by Sanger sequencing using standard protocols.

581

#### 582 BeviMed

583 We used BeviMed<sup>1</sup> to evaluate the evidence for association between case/control status and rare  
584 variant allele counts in each gene. We inferred a posterior probability of association (PPA) under  
585 Mendelian inheritance models (dominant and recessive), and different variant selection criteria  
586 ("moderate" and "high" impact variants based on functional consequences predicted by the Variant  
587 Effect Predictor<sup>39</sup>). All genes were assigned the same prior probability of association with the disease of  
588 0.01, regardless of their previously published associations with an immune deficiency phenotype. Genes  
589 for which BeviMed inferred a PPA to be >=0.18 when summed over all four combinations of inheritance  
590 model and variant selection criteria (each configuration being given a prior probability of association of  
591 0.0025) are shown in **Fig. 1f**. Given each of the association models, the posterior probability that each  
592 variant is pathogenic is also computed. We used a variant-level posterior probability of pathogenicity  
593 >0.2 to select potentially pathogenic missense variants in known PID genes to report back.

594

#### 595 Telomerecat

596 Average telomere length was calculated from whole-genome sequence data using Telomerecat, as  
597 reported previously<sup>22</sup>. Batch differences caused by changes in sequencing platform differences were  
598 normalised by using a linear model. The linear model was defined as:

$$length = \beta_0 + \beta_1 batch_2 + \beta_2 batch_3 \dots \beta_N batch_N + \epsilon$$

599

600 where  $\beta$  are regression coefficients, and batch represents a dummy variable denoting the plate a sample  
601 was sequenced on. For each plate the relevant coefficient was subtracted from all of the observed  
602 telomere lengths within each plate.

603 After adjusting for batch effects, telomere length was compared to age in 3,313 NBR-RD subjects. We  
604 obtained a strong negative correlation with age ( $r = -0.56$ , Pearson's correlation), thus validating  
605 Telomerecat as a reliable method for estimating telomere lengths. We found that each year of  
606 additional age was equivalent to a 33bp deterioration in telomere length (**Supplementary Fig. 6**).  
607 Although this observed negative correlation is well established within the literature, we obtain a  
608 particularly high correlation with our method, which could be partly driven by the wide age range of our  
609 sample set.

610 To normalise telomere lengths for comparison of samples from disparate age and gender, the following  
611 linear model was fitted to the data using age as a continuous variable and gender as a dummy variable:

$$\text{length} = \beta_0 + \beta_1 \text{age} + \beta_2 \text{age}^2 + \beta_3 \text{age}^3 + \beta_4 \text{gender} + \epsilon$$

612  
613 The relevant residuals produced by the cubic model were subtracted from the mean telomere length of  
614 the cohort. These adjusted telomere lengths were used in the GWAS analysis.

615 To assess for monogenic causes of telomere shortening, subjects were identified within the PID cohort  
616 that had telomere lengths below the 10<sup>th</sup> centile of age adjusted values and had hemizygous or  
617 homozygous SNVs that occurred gnomAD AF<0.001 in *TERC*, *TERT*, *NHP2*, *TINF2*, *NOP10*, *PARN*, *ACD*,  
618 *WRAP53*, *CTC1*, *RTEL1* or *DKC1* genes.

#### 619 620 AD-PID GWAS

621 GWAS was performed both on the whole PID cohort (N cases = 886) and on a subset of AD-PID cases (N  
622 cases = 733); here we present the results of the latter analysis, which was cleaner and less noisy despite  
623 a reduced sample size. We used 9225 unrelated samples from non-PID NBR-RD cohorts as controls.

624 Variants were selected from a merged VCF file were filtered to include bi-allelic SNPs with overall  
625 MAF $\geq$ 0.05 and minOPR=1 (100% pass rate). We ran PLINK logistic association test under an additive  
626 model using the read length, sex, and first 10 principal components from the ethnicity analysis as  
627 covariates. After filtering out SNPs with HWE  $p < 10^{-6}$ , we were left with the total of 4,993,945 analysed  
628 SNPs. There was minimal genomic inflation of the test statistic ( $\lambda = 1.027$ ), suggesting population  
629 substructure and sample relatedness had been appropriately accounted for. The only genome-wide  
630 significant ( $p < 5 \times 10^{-8}$ ) signal was at the MHC locus, with several suggestive ( $p < 1 \times 10^{-5}$ ) signals  
631 (**Supplementary Fig. 7**). We repeated the analysis with more relaxed SNP filtering criteria using  
632 MAF $\geq$ 0.005 and minOPR $>$ 0.95. The only additional signal identified were the three *TNFRSF13B* variants  
633 shown in **Extended Data Fig. 1**.

634 We obtained summary statistics data from the Li et al. CVID Immunochip case-control study<sup>9</sup> and  
635 performed a fixed effects meta-analysis on 95,417 variants shared with our AD-PID GWAS. For each of  
636 the genome-wide and suggestive loci after meta-analysis, we conditioned on the lead SNP by including it  
637 as an additional covariate in the logistic regression model, to determine if the signal is driven by the  
638 single or multiple hits at those loci. Only the MHC locus showed evidence of multiple independent  
639 signals (**Supplementary Fig. 8**).

#### 640 641 MHC locus imputation

642 We imputed classical HLA alleles using the method implemented in the SNP2HLA v1.0.3 package<sup>40</sup>,  
643 which uses Beagle v3.0.4 for imputation and the HapMap CEU reference panel. We imputed allele

644 dosages and best-guess genotypes of 2-digit and 4-digit classical HLA alleles, as well as amino acids of  
645 the MHC locus genes *HLA-A*, *HLA-B*, *HLA-C*, *HLA-DRB1*, *HLA-DQA1* and *HLA-DQB1*. We tested the  
646 association of both allele dosages and genotypes using the logistic regression implemented in PLINK,  
647 and obtained similar results. We then used the best-guess genotypes to perform the conditional analysis  
648 in PLINK, since conditioning is not implemented in a model with allele dosages.

649

#### 650 Allele Specific Expression

651 RNA and gDNA were extracted from PBMCs using the AllPrep kit (Qiagen) as per the manufacturer's  
652 instructions. RNA was reverse transcribed to make cDNA using the SuperScript™ VILO™ cDNA synthesis  
653 kit with appropriate minus reverse transcriptase controls, as per the manufacturer's instructions. The  
654 region of interest in the gDNA and 1:10 diluted cDNA was amplified using Phusion (Thermo Fisher) and  
655 the following primers on a G-Storm thermal cycler with 30 seconds at 98°C then 35 cycles of 98°C 10  
656 seconds, 60°C 30 seconds, 72°C 15 seconds.

#### 657 ***ARPC1B***

658 The region of interest spanning the frameshift variant was amplified using the following primers:  
659 Forward: GGGTACATGGCGTCTGTTTC / Reverse: CACCAGGCTGTTGTCTGTGA

660 PCR products were run on a 3.5% agarose gel. Bands were cut out and product extracted using the QIA  
661 Quick Gel Extraction Kit (Qiagen), as per protocol. Expected products were confirmed by Sanger  
662 sequencing. 4ul fresh PCR product was used in a TOPO® cloning reaction (Invitrogen) and used to  
663 transform One Shot™ TOP10 chemically competent *E. coli*. These were cultured overnight then spread  
664 on LB agar plates. Individual colonies were picked and genotyped. *ARPC1B* mRNA expression was  
665 assessed using a Taqman gene expression assay with 18S and *EEF1A1* as control genes. Each sample was  
666 run in triplicate for each gene with a no template control. PCR was run on a LightCycler® (Roche) with 2  
667 mins 50°C, 20 seconds 95°C then 45 cycles of 95°C 3 seconds, 60°C 30 seconds.

#### 668 ***PTPN2***

669 *PTPN2* ASE protocol is modified from above. RNA and genomic DNA were extracted from PBMCs using  
670 the AllPrep Kit (Qiagen). RNA was treated with Turbo DNase (Thermo) and reverse transcribed to  
671 generate cDNA using the SuperScript IV VILO master mix (Thermo). The intronic region of interest in  
672 gDNA and cDNA was amplified by two nested PCR reactions using Phusion enzyme (Thermo). The  
673 primers (F1/R1) and nested primers (F2/R2) used were:

674 Forward\_1: aaagtctggagcaggcagag / Reverse\_1: tgggggaactggttatgctttc  
675 Forward\_2: ggagctatgatcacgccatg / Reverse\_2: atgctttctggtgggctgac

676

677 PCR products were run on a 1% agarose gel. Bands were cut out and product extracted using the QIA  
678 Quick Gel Extraction Kit (Qiagen), as per protocol. Expected products were confirmed by Sanger  
679 sequencing. 5ng fresh PCR product was used in a TOPO® cloning reaction (Invitrogen) and used to  
680 transform One Shot™ TOP10 chemically competent *E. coli*. These were cultured overnight then spread  
681 on LB agar plates. Individual colonies were picked and genotyped. *PTPN2* mRNA expression was  
682 assessed using a Taqman SNP genotyping assay and on a LightCycler (Roche).

683

#### 684 PAGE and Western Blot analysis

685 Samples were separated by SDS polyacrylamide gel electrophoresis and transferred onto a nitrocellulose  
686 membrane. Individual proteins were detected with antibodies against *ARPC1b* (goat polyclonal  
687 antibodies, ThermoScientific, Rockford, IL, USA), against *ARPC1a* (rabbit polyclonal antibodies, Sigma, St  
688 Louis, USA) and against actin (mouse monoclonal antibody, Sigma). Secondary antibodies were either  
689 donkey-anti-goat-IgG IRDye 800CW, Goat-anti-mouse-IgG IRDye 800CW or Donkey-anti-rabbit-IgG IRDye

690 680CW (LI-COR Biosciences, Lincoln, NE, USA). Quantification of bound antibodies was performed on an  
691 Odyssey Infrared Imaging system (LI-COR Biosciences, Lincoln, NE, USA).

692

### 693 Phasing of *SOCS1* variants

694 To phase common rs2286974 variant with the novel stop-gain *SOCS1* variant (chr16:11348854  
695 T>TGCGGC) identified in the same patient, we performed long-read WGS with Oxford Nanopore  
696 Technologies (ONT). The sample was prepared using the 1D ligation library prep kit (SQK-LSK108), and  
697 genomic libraries were sequenced on R9.4 flowcells. Sequencing was carried out on GridION system,  
698 read sequences were extracted from base-called FAST5 files by Guppy (v0.5.1) to generate FASTQ files,  
699 which were then aligned against the GRCh37/hg19 human reference genome using minimap2 (v2.2).  
700 Four runs were performed in order to reach an average coverage of 14x, with a median read length of  
701  $5006 \pm 3981$ . Haplotyping and genotyping was performed with MarginPhase.

702

### 703 Structural deletion analysis

704 Structural (length >50bp) deletions (MAF>0.03) were called as previously described<sup>41</sup>. For all  
705 downstream analysis we used gencode v26 annotations downloaded from  
706 [[ftp://ftp.sanger.ac.uk/pub/gencode/Gencode\\_human/release\\_26/GRCh37\\_mapping/gencode.v26lift37](ftp://ftp.sanger.ac.uk/pub/gencode/Gencode_human/release_26/GRCh37_mapping/gencode.v26lift37.annotation.gtf.gz)  
707 [.annotation.gtf.gz](ftp://ftp.sanger.ac.uk/pub/gencode/Gencode_human/release_26/GRCh37_mapping/gencode.v26lift37.annotation.gtf.gz)]. We defined promoters as a window +/- 500bp of any protein coding gene  
708 transcriptional start site (TSS). In order to associate cis regulatory elements (cRE) with putative target  
709 genes we combined by physical location overlap, super enhancer cRE annotations from<sup>18</sup>, with  
710 promoter capture Hi-C (pcHi-C) from<sup>19</sup>, matching by tissue. We next computed the overlap of structural  
711 variants occurring in the PID cohort with cREs for which putative target genes were available. We  
712 classified overlaps between deletions and functional annotations into three non-mutually exclusive  
713 categories; 'prom' - overlaps focal gene promoter, 'exon' - overlaps focal gene exon, 'pse' - overlaps  
714 Hnisz *et al.*<sup>18</sup> SE annotation linked to focal gene by pcHi-C. We compiled a catalogue of compound  
715 heterozygous deletions where there was evidence in the same individual for a damaging (CADD>20) rare  
716 (gnomAD AF<0.001) variant within the same gene.

717

### 718 AD-PID GWAS Enrichment

719 Due to the size of the AD-PID cohort, we were unable to use LD-score regression<sup>42</sup> to assess genetic  
720 correlation between distinct and related traits. We therefore adapted the previous enrichment method  
721 'blockshifter'<sup>43</sup> in order to assess evidence for the enrichment of AD-PID association signals in a  
722 compendium of 9 GWAS European Ancestry summary statistics was assembled from publicly available  
723 data. We removed the MHC region from all downstream analysis [GRCh37 chr6:25-45Mb]. To adjust for  
724 linkage disequilibrium (LD), we split the genome into 1cM recombination blocks based on HapMap  
725 recombination frequencies<sup>44</sup>. For a given GWAS trait, for  $n$  variants within LD block  $b$  we used  
726 Wakefield's synthesis of asymptotic Bayes factors (aBF)<sup>45</sup> to compute the posterior probability that the  
727  $i^{th}$  variant is causal ( $PPCV_i$ ) under single causal variant assumptions<sup>46</sup> :

728

729

$$PPCV_i = \frac{aBF_i \pi_i}{\sum_{j=1}^n (aBF_j \pi_j) + 1}$$

730 Here  $\pi_i = \pi_j$  are flat prior probabilities for a randomly selected variant from the genome to be causal  
731 and we use the value  $1 \times 10^{-47}$ . We sum over these PPCV within an LD block,  $b$  to obtain the posterior  
732 probability that  $b$  contains a single causal variant (PPCB).

733 To compute enrichment for trait  $t$ , we convert PPCBs into a binary label by applying a threshold such  
734 that  $PPCB_t > 0.95$ . We apply these block labels for trait  $t$ , to PPCBs (computed as described above) for  
735 our AD-PID cohort GWAS, using them to compute a non-parametric Wilcoxon rank sum statistic,  $W$   
736 representing the enrichment. Whilst the aBF approach naturally adjusts for LD within a block, residual  
737 LD between blocks may exist. In order to adjust for this and other confounders (e.g. block size) we use a  
738 circularised permutation technique<sup>48</sup> to compute  $W_{null}$ . To do this, for a given chromosome, we select  
739 recombination blocks, and circularise such that beginning of the first block adjoins the end of the last.  
740 Permutation proceeds by rotating the block labels, but maintaining AD-PID PPCB assignment. In this way  
741 many permutations of  $W_{null}$  can be computed whilst conserving the overall block structure.

742 For each trait we used  $10^4$  permutations to compute adjusted Wilcoxon rank sum scores using *wgsea*  
743 [<https://github.com/chr1swallace/wgsea>] R package.

744

#### 745 PID monogenic candidate gene prioritisation

746 We hypothesised, given the genetic overlap with antibody associated PID, that common regulatory  
747 variation, elucidated through association studies of immune-mediated disease, might prioritise genes  
748 harbouring damaging LOF variants underlying PID. Firstly, using summary statistics from our combined  
749 fixed effect meta-analysis of AD-PID, we compiled a list of densely genotyped ImmunoChip regions  
750 containing one or more variant where  $P < 1 \times 10^{-5}$ . Next, we downloaded ImmunoChip (IC) summary  
751 statistics from ImmunoBase (accessed 30/07/2018) for all 11 available studies. For each study we  
752 intersected PID suggestive regions, and used COGS (<https://github.com/ollyburren/rCOGS>) in  
753 conjunction with promoter-capture Hi-C datasets for 17 primary cell lines<sup>19,43</sup> in order to prioritise genes.  
754 We filtered by COGS score to select genes with a COGS score  $> 0.5$ <sup>19,43</sup> to obtain a list of 11 protein  
755 coding genes.

756 We further hypothesised that genes harbouring rare LOF variation causal for PID would be intolerant to  
757 variation. We thus downloaded pLI scores<sup>49</sup> and took the product between these and the COGS scores  
758 to compute an 'overall' prioritisation score across each trait and gene combination. We applied a final  
759 filter taking forward only those genes having an above average 'overall' score to obtain a final list of 6  
760 candidate genes (Fig. 4d). Finally, we filtered the cohort for damaging rare (gnomAD AF < 0.001) protein-  
761 truncating variants (frameshift, splice-site, nonsense) within these genes in order to identify individuals  
762 for functional follow up.

763

#### 764 Statistical analysis

765 Statistical analysis was carried out using R (3.3.3 – “Another Canoe”) and Graphpad Prism (version 7)  
766 unless otherwise stated. R code for running major analyses are available at  
767 [https://github.com/ollyburren/pid\\_thaventhiran\\_et\\_al](https://github.com/ollyburren/pid_thaventhiran_et_al).

768

#### 769 **Methods References**

770

- 771 38. Richards, S. *et al.* Standards and guidelines for the interpretation of sequence variants: a joint  
772 consensus recommendation of the American College of Medical Genetics and Genomics and the  
773 Association for Molecular Pathology. *Genet. Med.* **17**, 405–423 (2015).
- 774 39. McLaren, W. *et al.* The Ensembl Variant Effect Predictor. *Genome Biol.* **17**, 122 (2016).
- 775 40. Jia, X. *et al.* Imputing amino acid polymorphisms in human leukocyte antigens. *PLoS One* **8**,  
776 e64683 (2013).
- 777 41. Carss, K. J. *et al.* Comprehensive Rare Variant Analysis via Whole-Genome Sequencing to  
778 Determine the Molecular Pathology of Inherited Retinal Disease. *Am. J. Hum. Genet.* **100**, 75–90  
779 (2017).
- 780 42. Bulik-Sullivan, B. K. *et al.* LD Score regression distinguishes confounding from polygenicity in



- 781 genome-wide association studies. *Nat. Genet.* **47**, 291–5 (2015).  
782 43. Burren, O. S. *et al.* Chromosome contacts in activated T cells identify autoimmune disease  
783 candidate genes. *Genome Biol.* **18**, 165 (2017).  
784 44. International HapMap Consortium, T. I. H. *et al.* A second generation human haplotype map of  
785 over 3.1 million SNPs. *Nature* **449**, 851–61 (2007).  
786 45. Wakefield, J. Bayes factors for genome-wide association studies: comparison with *P*-values.  
787 *Genet. Epidemiol.* **33**, 79–86 (2009).  
788 46. Wellcome Trust Case Control Consortium, J. B. *et al.* Bayesian refinement of association signals  
789 for 14 loci in 3 common diseases. *Nat. Genet.* **44**, 1294–301 (2012).  
790 47. Huang, H. *et al.* Fine-mapping inflammatory bowel disease loci to single-variant resolution.  
791 *Nature* **547**, 173–178 (2017).  
792 48. Trynka, G. *et al.* Disentangling the Effects of Colocalizing Genomic Annotations to Functionally  
793 Prioritize Non-coding Variants within Complex-Trait Loci. *Am. J. Hum. Genet.* **97**, 139–52 (2015).  
794 49. Lek, M. *et al.* Analysis of protein-coding genetic variation in 60,706 humans. *Nature* **536**, 285–91  
795 (2016).

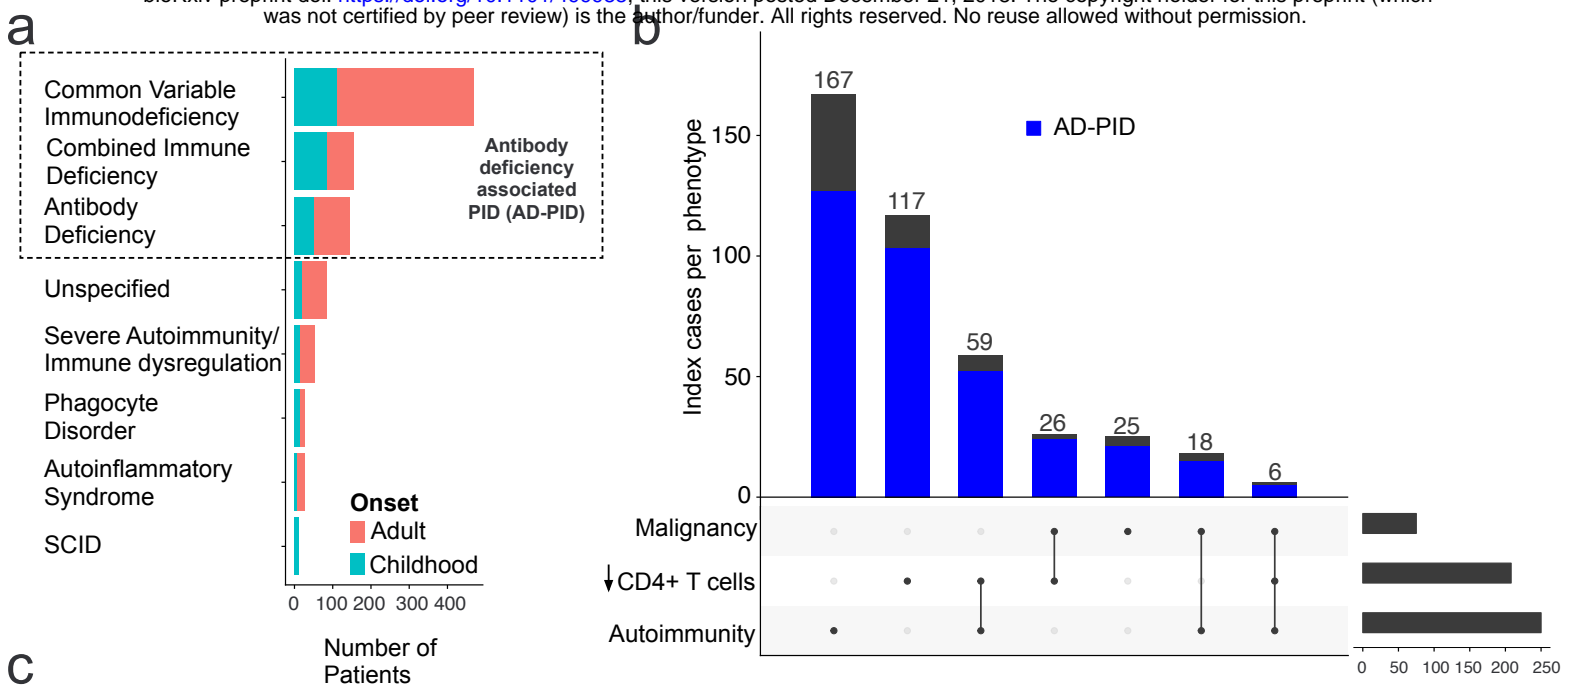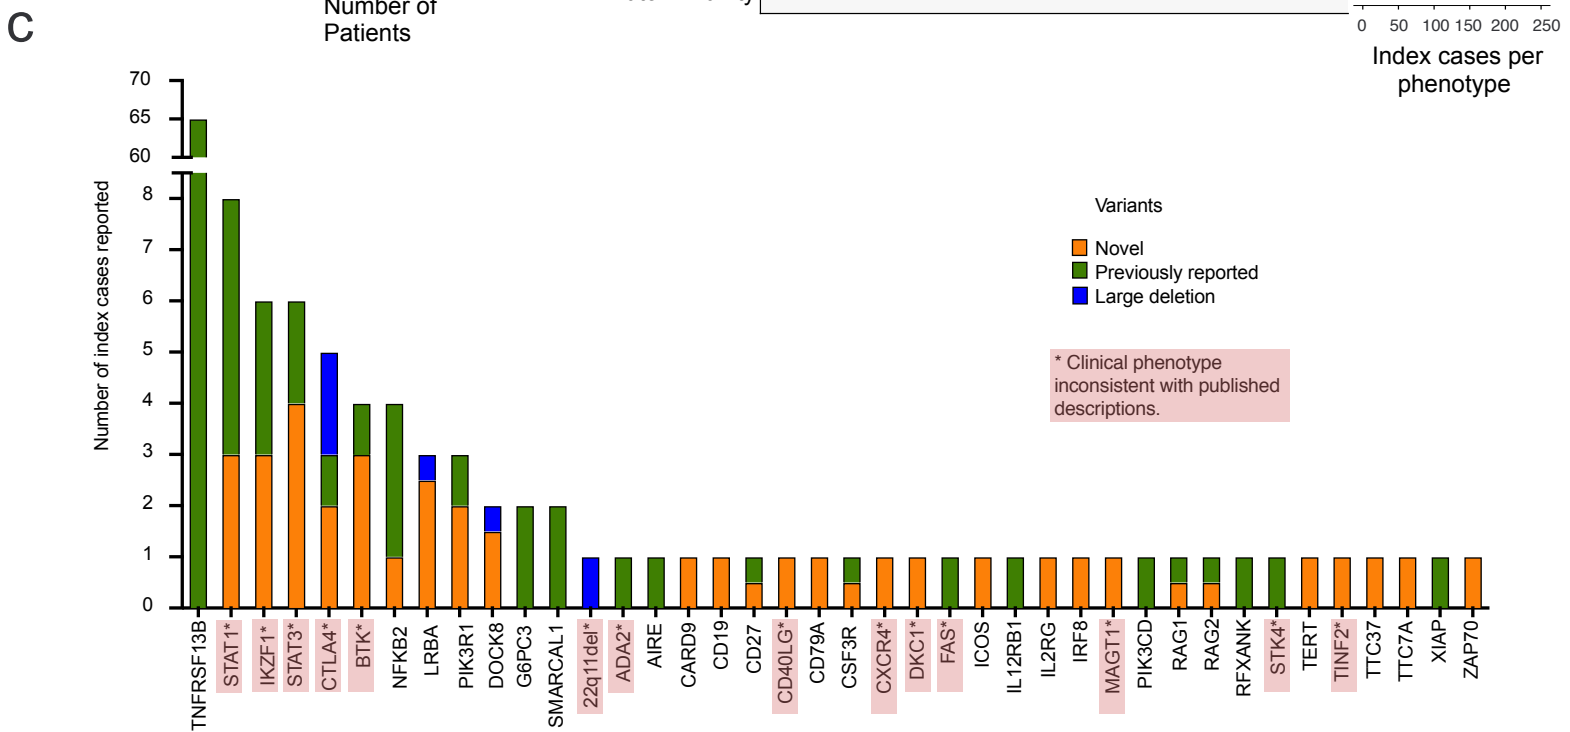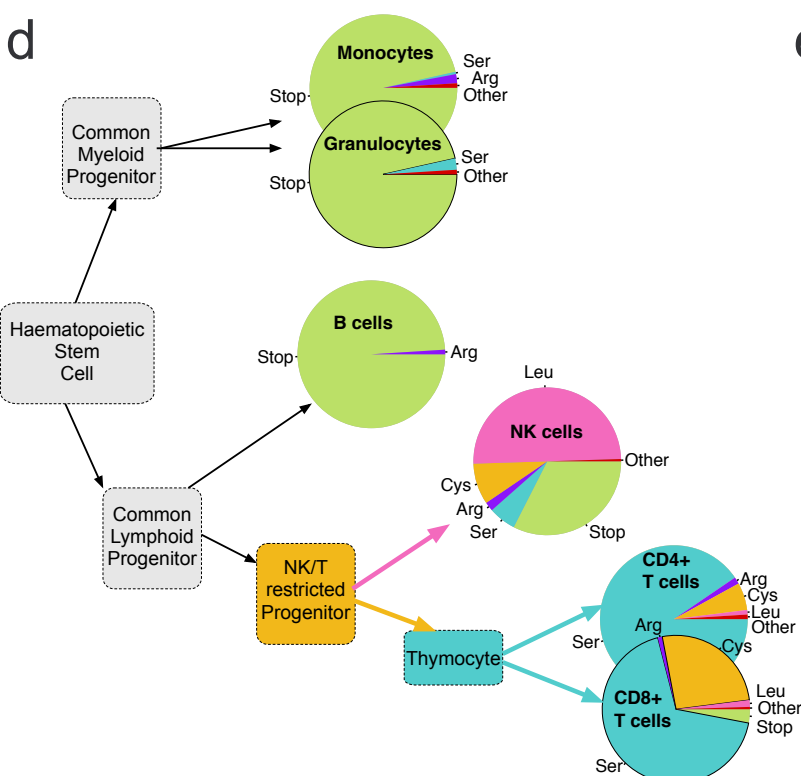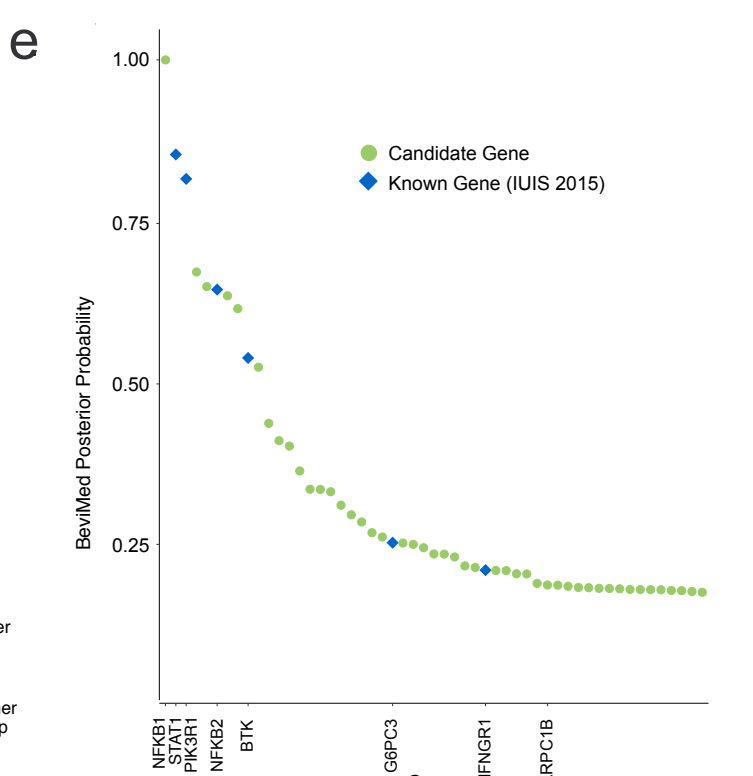

a

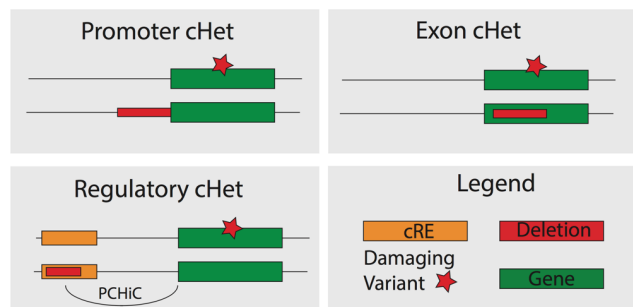

b

Deletion events in PID (NBR-RD MAF &lt; 0.03)

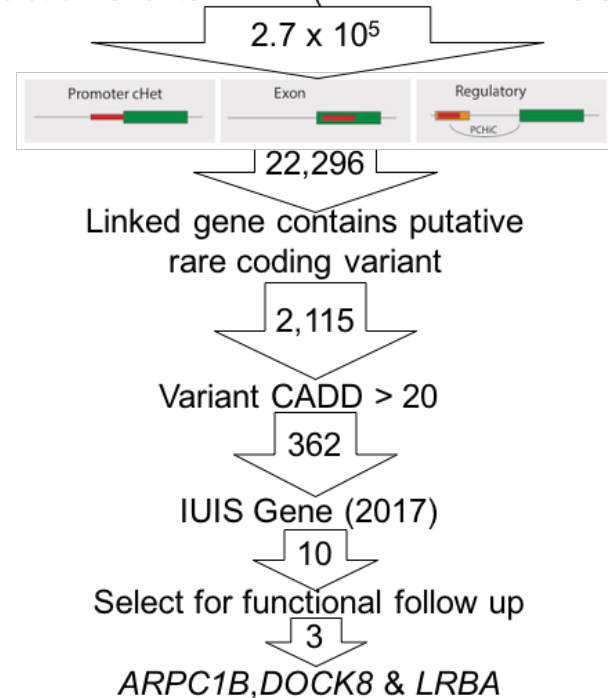

c

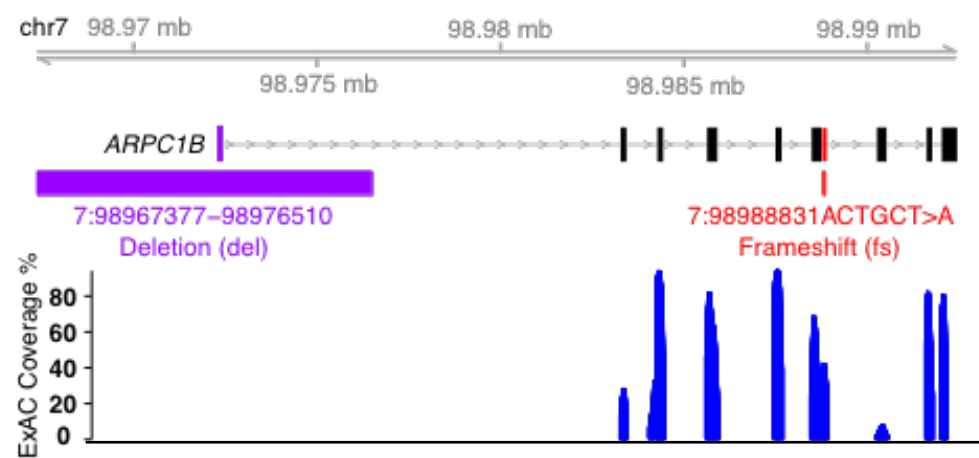

d

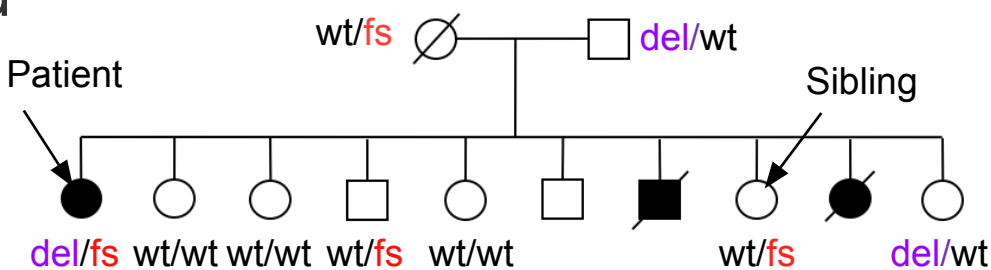

e

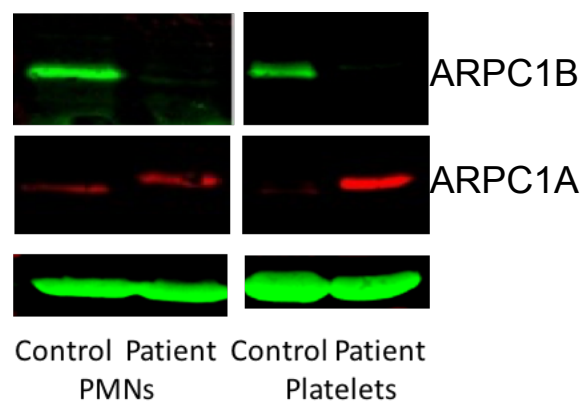

f

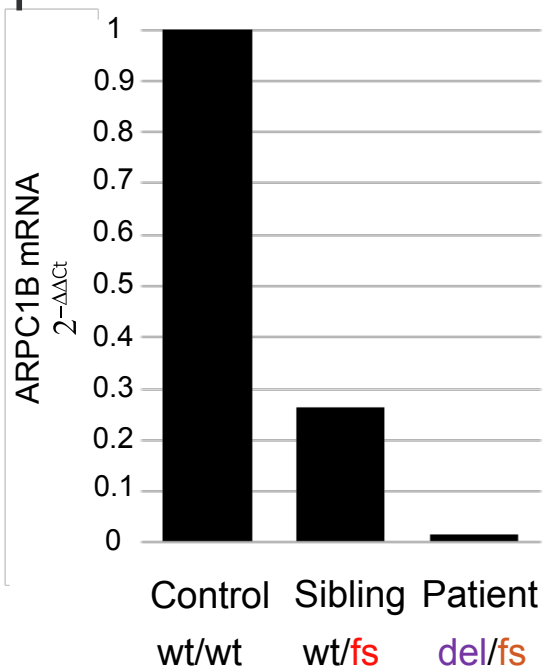

g

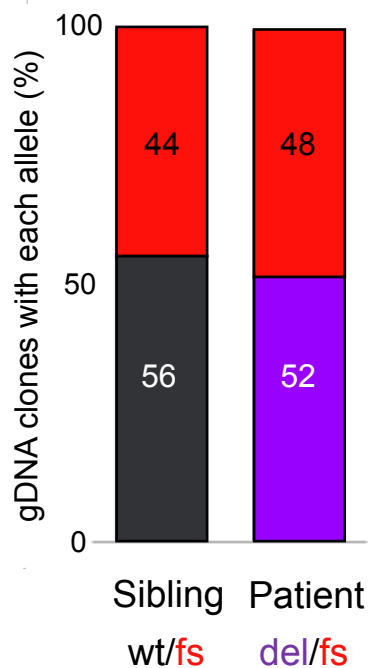

h

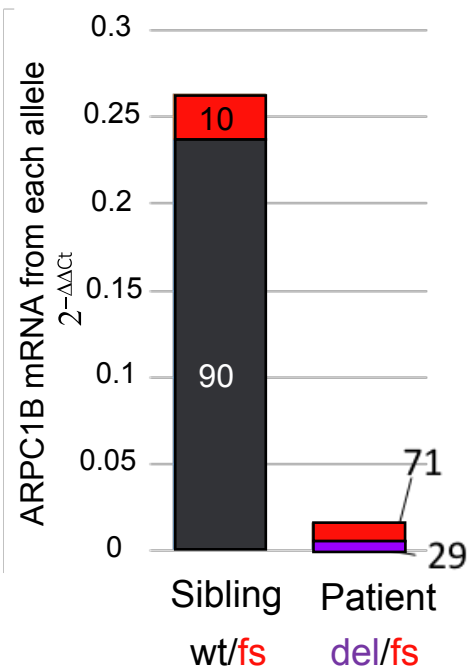

a

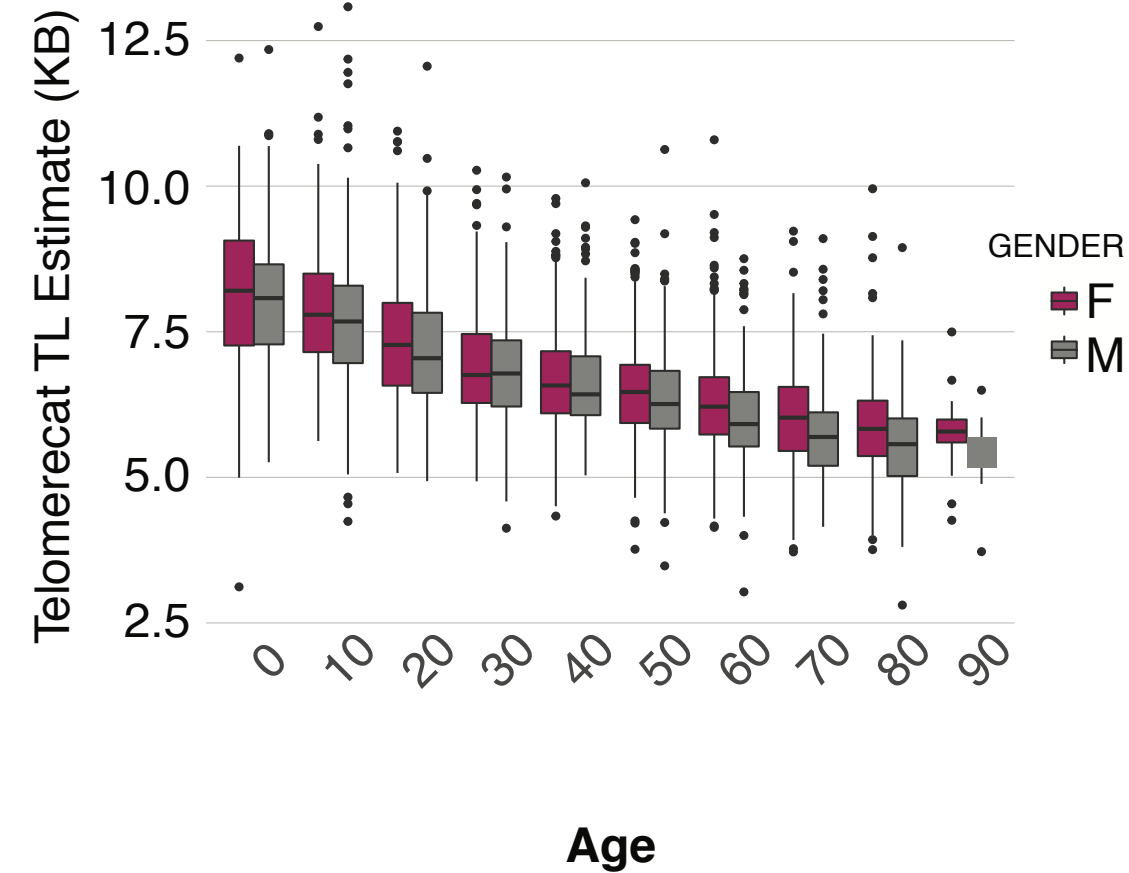

b

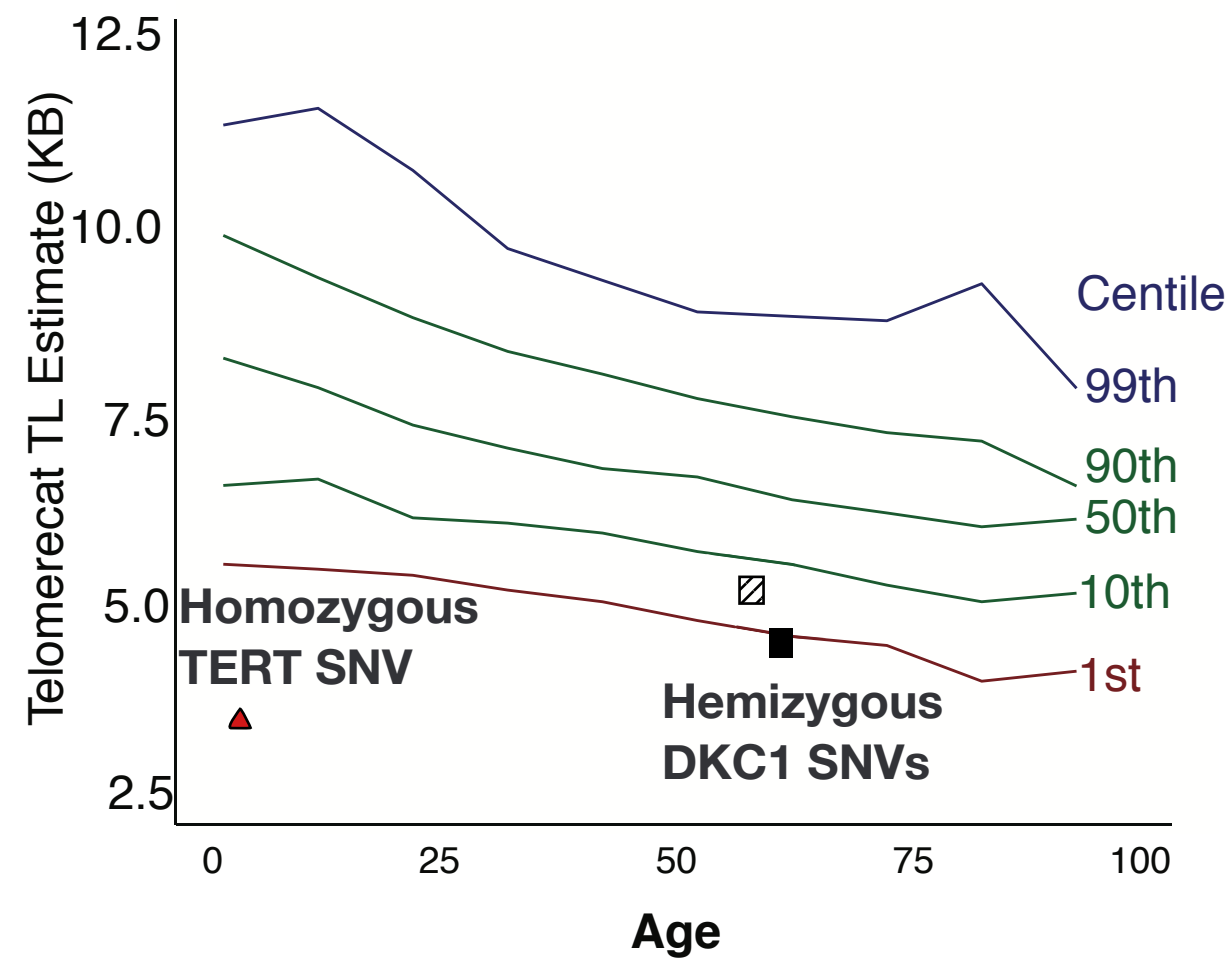

c

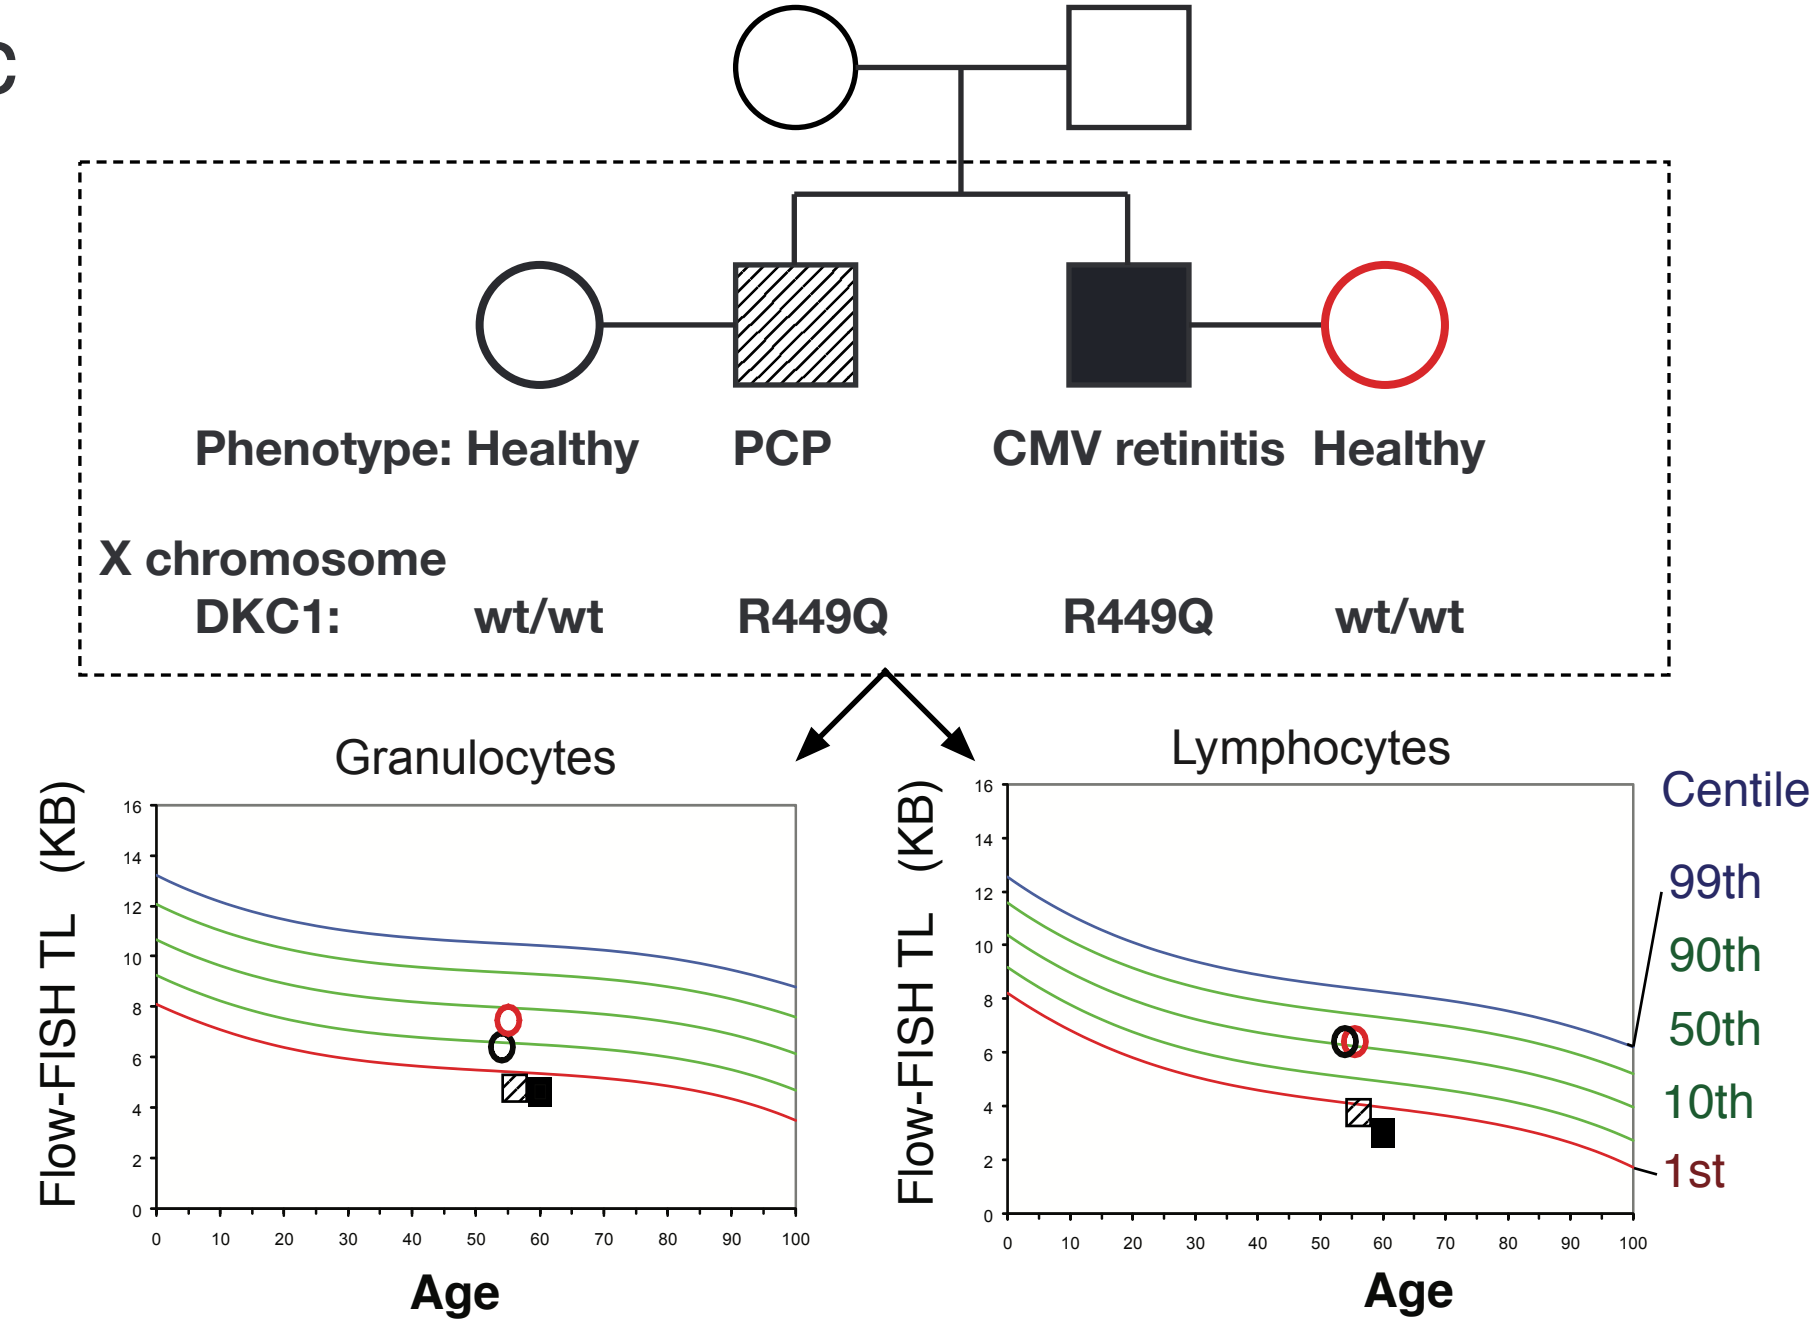

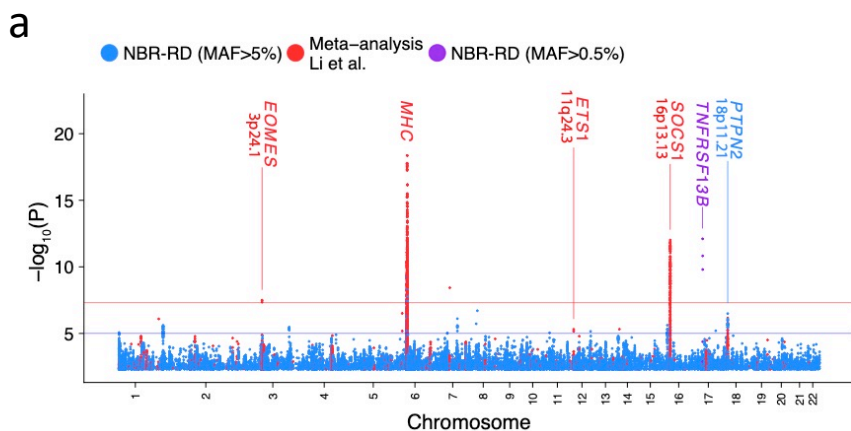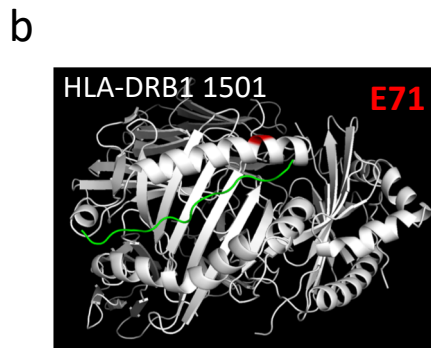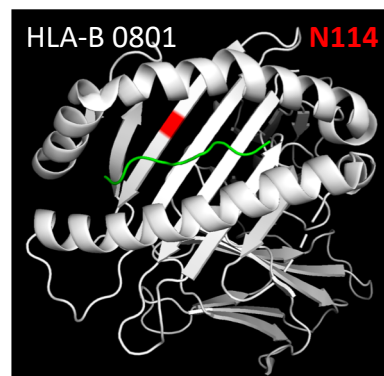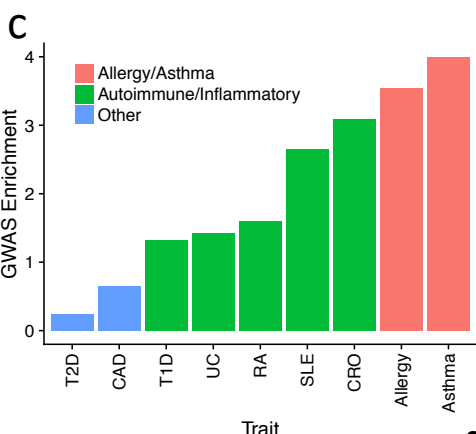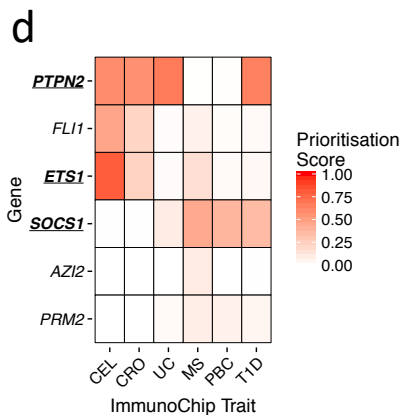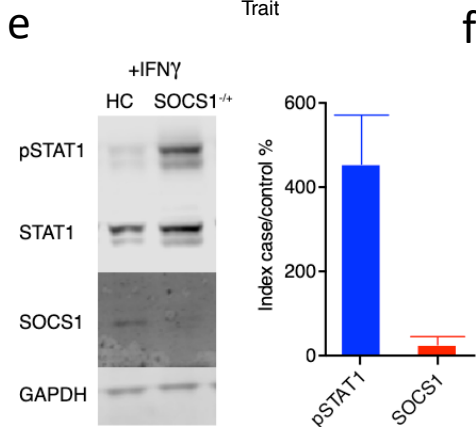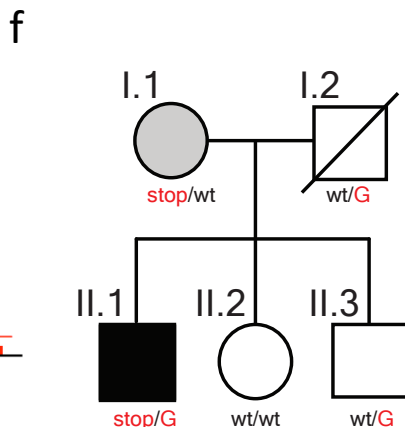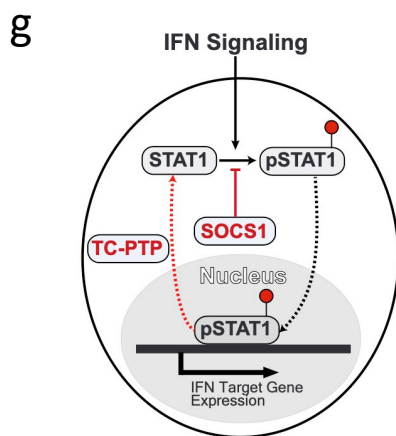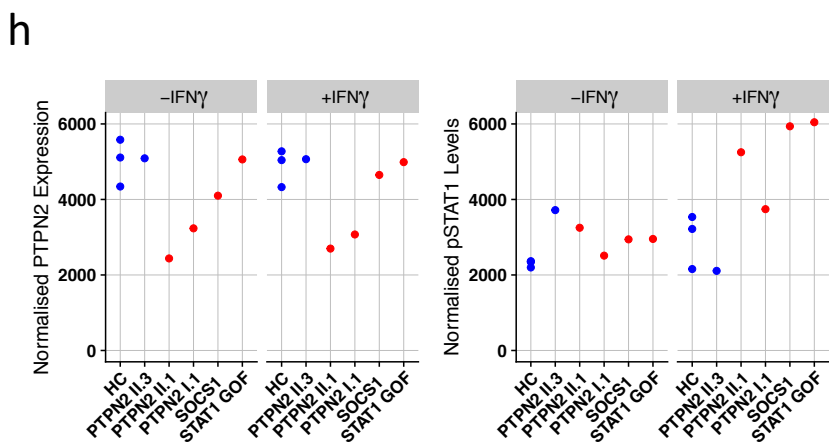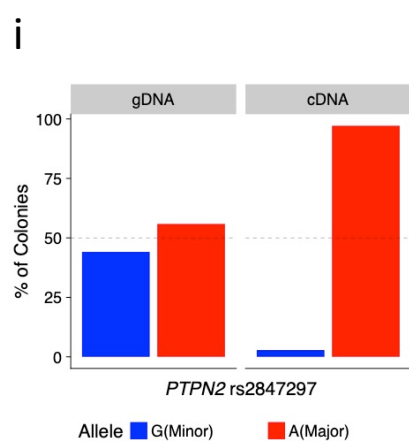



## **Extended Data Items Legends**

**Extended Data Table 1.** GWAS studies used in enrichment analysis

**Extended Data Fig. 1.** Regional AD-PID association plot of 17p11.2 (*TNFRSF13B/TACI*) region. Tracks are as follows: **AD-PID -log<sub>10</sub>(P)** dot plot of AD-PID association, index SNP ( is purple, others are coloured based on LD information from UK10K project with red indicating high LD ( $r^2 > 0.9$ ), blue low ( $r^2 < 0.2$ ) and grey where no information available. **Gene** - Canonical gene annotation (Ensembl V75), **GWAS** - location of index variants from other immune-mediated disease, **CD4**, **B**, **Mon** putative regulatory regions in CD+T-cells, Total B cells and Monocytes computed from the union of ATAC-Seq and H3K27ac CHIP-Seq data, **pcHi-C** - Promoter Capture Hi-C interactions, in above primary cell types.

**Extended Data Fig. 2.** Regional AD-PID meta-analysis association plot of 3p24.1 (*EOMES*) region. Tracks as described for Extended Data Fig.1 with the exception of **Meta -log(P)** which shows dot plot of AD-PID association meta-analysis with Li *et al.* Detail shows location of RA index SNP that overlaps AD-PID index variant and its promoter proximity.

**Extended Data Fig. 3.** Comparison of GWAS association signals at 18p11.21 for **Li *et al.***, **NBR-RD AD-PID** (this study), and **Meta** (Meta-analysis). Y-axis is  $-\log_{10}(P)$  of univariate association statistic. Top SNP in each study is marked in cyan.

**Extended Data Fig. 4.** Locus plot of Regional AD-PID meta-analysis association plot of 16p13.13 (*CLEC16A/SOCS1*). Tracks as described in Extended Data Fig. 2.

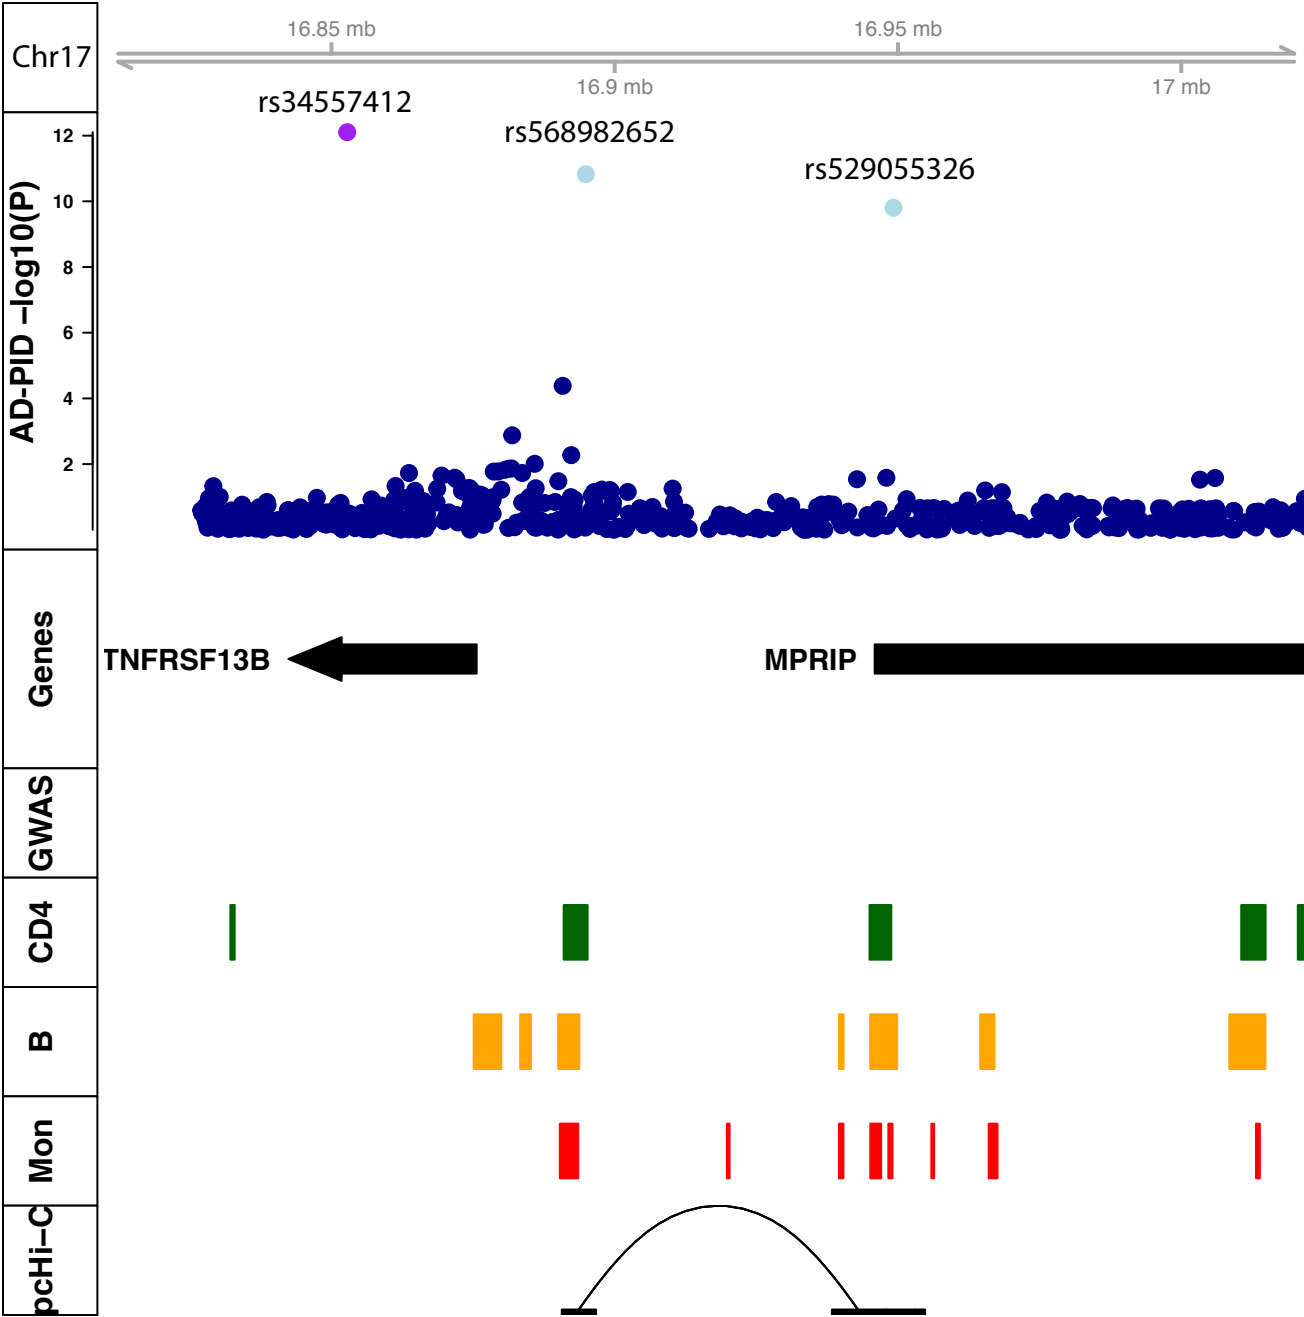

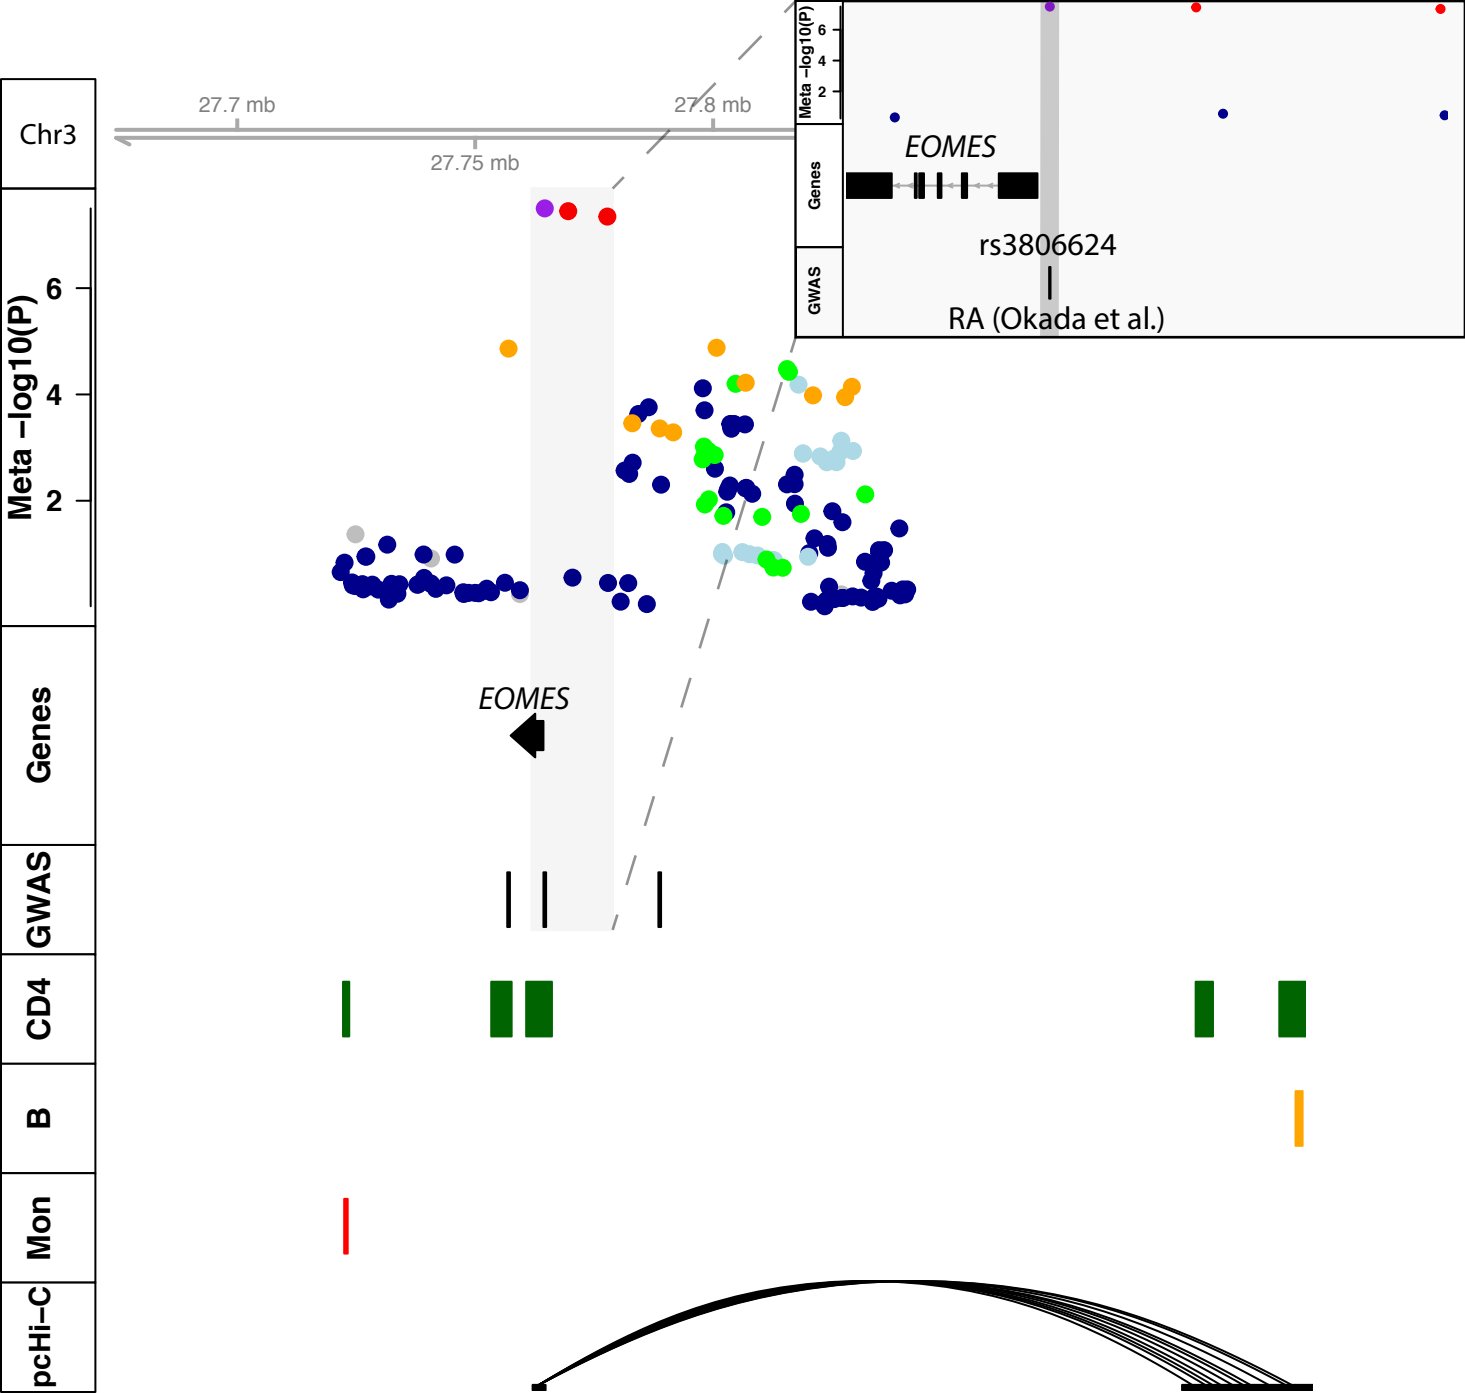

Genes

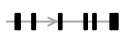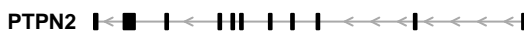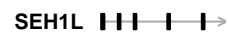

Li et al.

4  
3  
2  
1

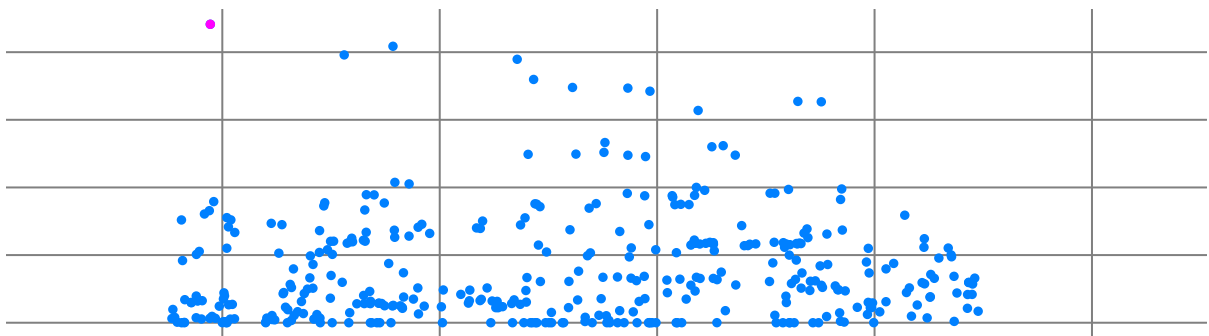

Other rs2847249

NBR-RD

6  
4  
2

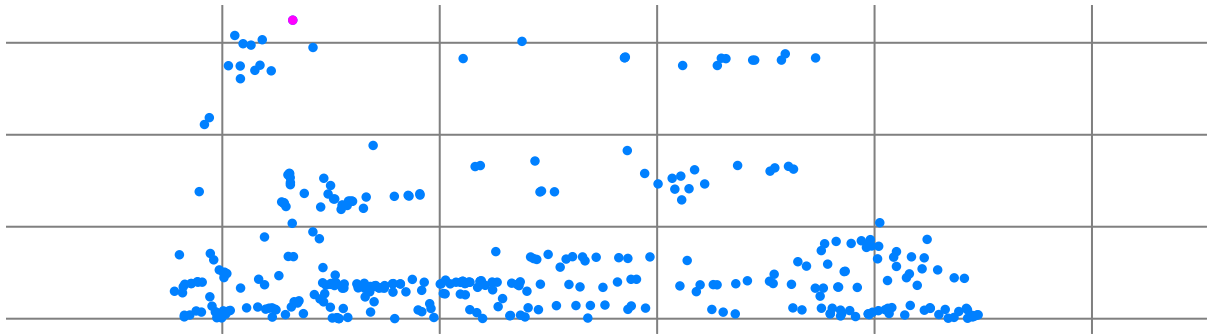

Other rs12966224

Meta

6  
5  
4  
3  
2  
1

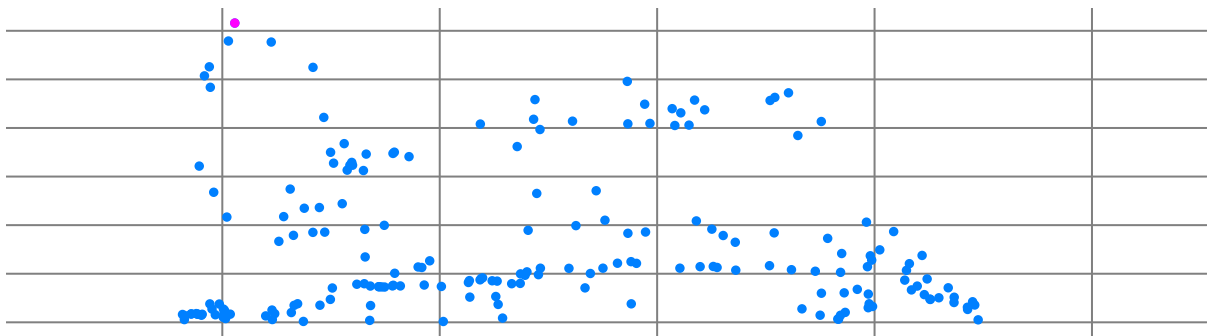

Other rs80191532

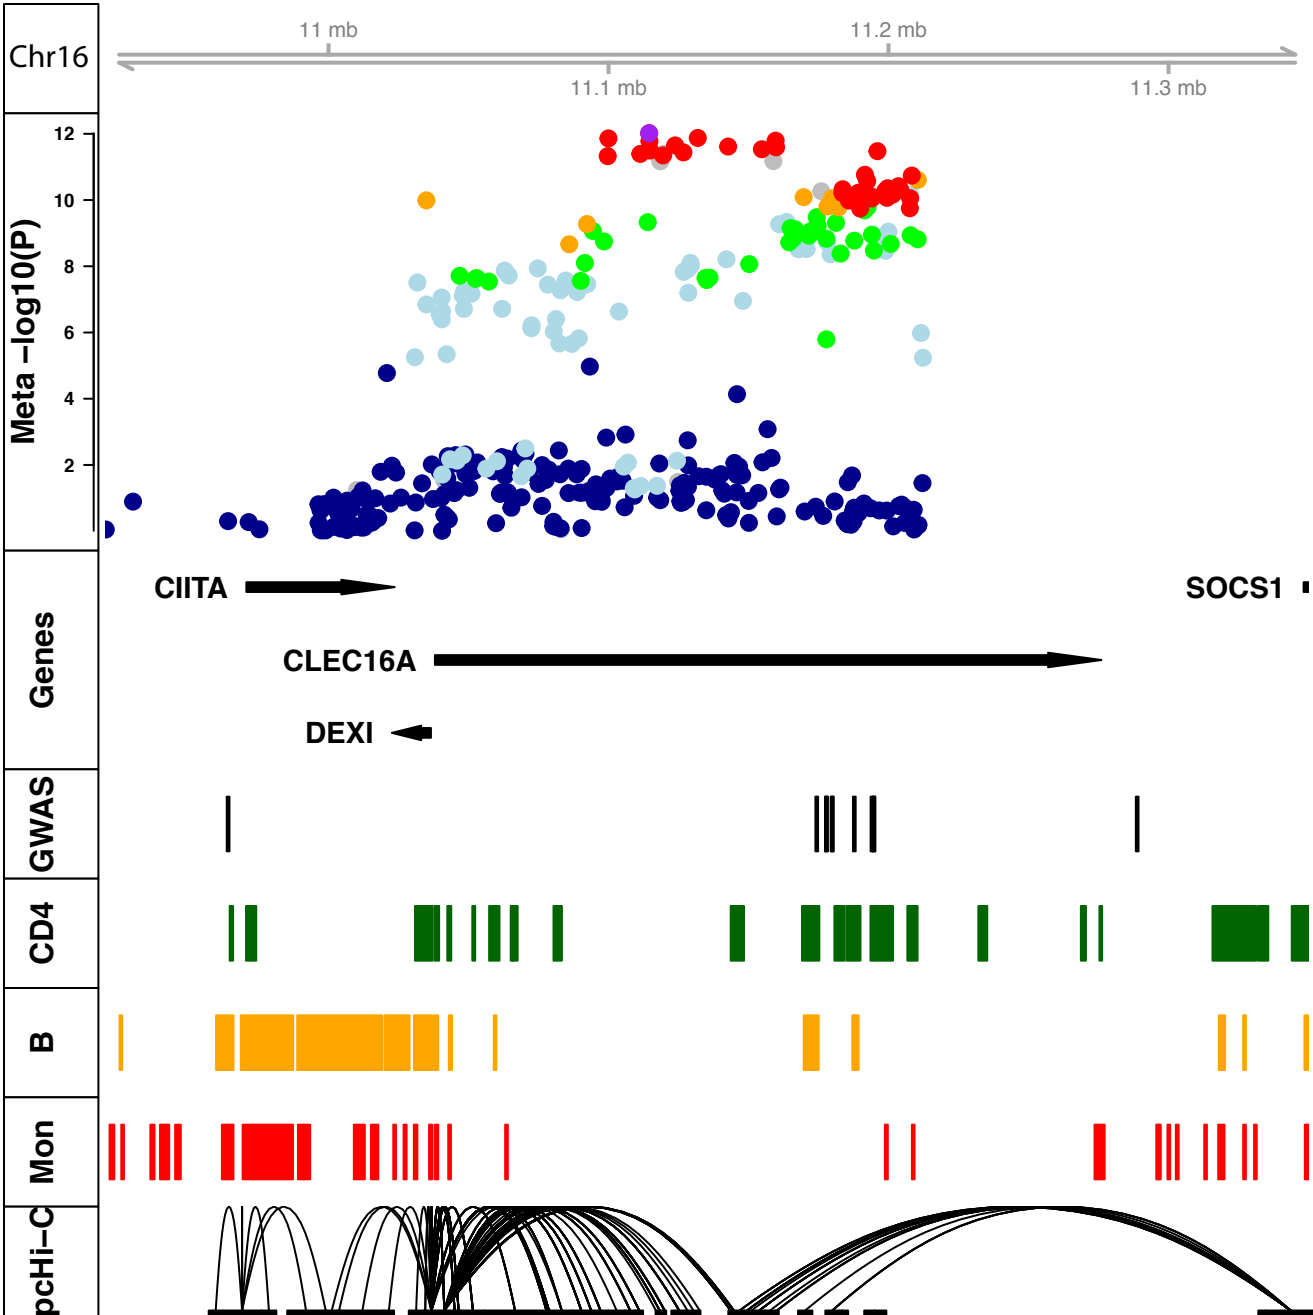

Source: https://www.biorxiv.org/content/10.1101/499988v1.full.pdf
